# Supplementary material
Source: PubMed Central journal article supplement (PMC5226647)

# **Practical Synthetic Procedures of the Iron-Catalyzed Intermolecular Olefin Aminohydroxylation Using Functionalized Hydroxylamines**

Cheng-Liang Zhu,<sup>†</sup> Deng-Fu Lu,<sup>†</sup> Jeffrey D. Sears, Zhen-Xin Jia, and Hao Xu\*

*Department of Chemistry, Georgia State University, Atlanta GA 30303, United States*

## **Supporting Material**

### **A. General Information**

### **B. Procedures for the Iron-Catalyzed Asymmetric Indene Aminohydroxylation**

### **C. Iron-Catalyzed Amino-Oxygenation of Isomeric $\beta$ -Methyl Styrenes**

### **D. Catalytic Indene Aminohydroxylation Using the Preformed Iron Catalyst**

### **E. References**

### **F. NMR Spectra**

## A. General Information

**General Procedures.** All reactions were performed in oven-dried or flame-dried round-bottom flasks and vials. Stainless steel syringes and cannula were used to transfer air- and moisture-sensitive liquids. Flash chromatography was performed using silica gel 60 (230-400 mesh) from Sigma–Aldrich.

**Materials.** Commercial reagents were purchased from Sigma Aldrich, Fluka, EM Science, and Lancaster and used as received. All solvents were used after being freshly distilled unless otherwise noted.

**Instrumentation.** Proton nuclear magnetic resonance ( $^1\text{H}$  NMR) spectra, carbon nuclear magnetic resonance ( $^{13}\text{C}$  NMR) spectra and fluorine nuclear magnetic resonance ( $^{19}\text{F}$  NMR) were recorded on Bruker UltraShield-400 (400 MHz). Chemical shifts for protons are reported in parts per million downfield from tetramethylsilane and are referenced to the NMR solvent residual peak ( $\text{CHCl}_3$ :  $\delta$  7.26). Chemical shifts for carbons are reported in parts per million downfield from tetramethylsilane and are referenced to the carbon resonances of the NMR solvent ( $\text{CDCl}_3$ :  $\delta$  77.0). Chemical shifts for fluorine are reported in parts per million downfield and are referenced to the fluorine resonances of  $\text{CFCl}_3$ . Data are represented as follows: chemical shift, multiplicity (br = broad, s = singlet, d = doublet, t = triplet, q = quartet, m = multiplet), coupling constants in Hertz (Hz), and integration.

The mass spectroscopic data were obtained at the Georgia State University mass spectrometry facility using a Micromass Platform II single quadrupole instrument. Infrared (IR) spectra were obtained using a Perkin Elmer Spectrum 100 FT-IR spectrometer. Data are represented as follows: frequency of absorption ( $\text{cm}^{-1}$ ) and absorption strength (s = strong, m = medium, w = weak).

**Abbreviations used:** EtOH–ethanol, EtOAc–ethyl acetate, THF–tetrahydrofuran, MeOH–methanol,  $\text{Et}_2\text{O}$ –diethyl ether,  $\text{CH}_2\text{Cl}_2$ –dichloromethane, TEA–triethylamine, MeCN–acetonitrile, MS–molecular sieves, CDI–1,1'-carbonyldiimidazole, Troc–2,2,2-trichloroethoxycarbonyl, DCC–*N,N'*-dicyclohexylcarbodiimide, TLC–thin layer chromatography,  $\text{Boc}_2\text{O}$ –di-*tert*-butyl dicarbonate, DMAP–4-dimethylaminopyridine.

## B. Procedure for the Iron-Catalyzed Asymmetric Indene Amino-Oxygenation

### a. Discovery of Chiral Ligands for Asymmetric Induction

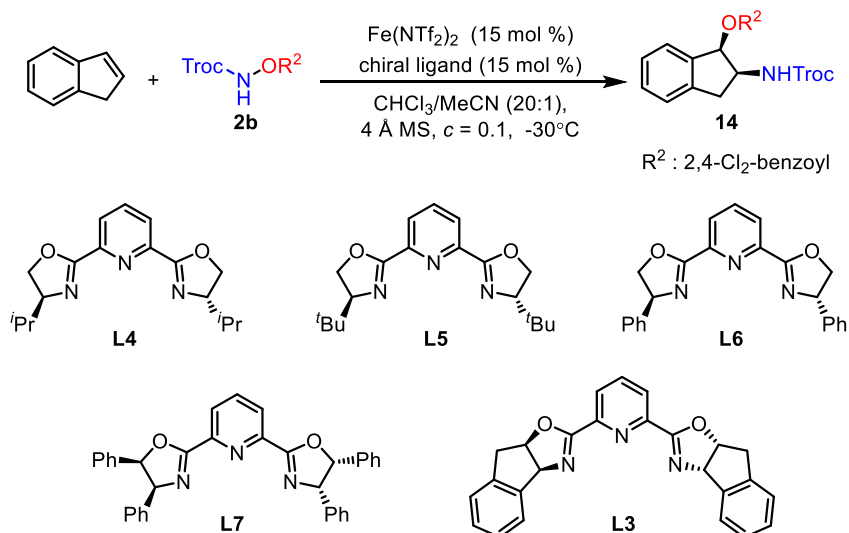

| entry | ligand    | isolated yield | ee  |
|-------|-----------|----------------|-----|
| 1     | <b>L4</b> | 39%            | 33% |
| 2     | <b>L5</b> | 35%            | 40% |
| 3     | <b>L6</b> | 42%            | 56% |
| 4     | <b>L7</b> | 48%            | 51% |
| 5     | <b>L3</b> | 71%            | 81% |

Ligand **L3** was synthesized according to a known procedure.<sup>1</sup>

To a flame-dried sealable 2-dram vial (vial **A**) equipped with a stir bar were added  $\text{Fe}(\text{NTf}_2)_2$  (36.9 mg, 0.06 mmol) and a chiral ligand (0.06 mmol). After the vial was evacuated and backfilled with  $\text{N}_2$  for three times, anhydrous  $\text{CHCl}_3$  (0.8 mL) and MeCN (0.2 mL) were added via a syringe and the mixture was stirred at room temperature for 20 min. To another flame dried 2-dram vial (vial **B**) equipped with a stir bar were added activated 4 Å molecular sieves (100 mg) and **2b** (152.4 mg, 0.40 mmol). The vial was also was evacuated and backfilled with  $\text{N}_2$  for three times and then anhydrous  $\text{CHCl}_3$  (3.0 mL) was added via a syringe. Both solutions were degassed with brief evacuation and backfilling with  $\text{N}_2$  twice. Then indene (55.9  $\mu\text{L}$ , 0.48 mmol) was added to vial **B** and the catalyst solution (vial **A**) was added by a syringe pump over 30 min to vial **B** at  $-30^\circ\text{C}$ . The reaction was kept stirring at the same temperature for another 30 min. The reaction was quenched with saturated  $\text{NaHCO}_3$  aqueous solution (2 mL) and stirred vigorously for additional 10 min. The organic layer was separated and the aqueous phase was

extracted with CH<sub>2</sub>Cl<sub>2</sub> (2 mL × 2) and EtOAc (2 mL × 2). The combined organic layers were dried over anhydrous Na<sub>2</sub>SO<sub>4</sub> and concentrated *in vacuo*. The product **14** was isolated through a silica gel flash column and analyzed through chiral HPLC columns. The results are listed in the table.

When chiral Ligand **L3** was applied, the product **14** was isolated through a silica gel flash column (hexanes/acetone: from 50:1 to 6:1) as a white solid.

**14**, yield: 141.3 mg (71%).

$[\alpha]_D^{20} = -60.1$  (*c* 1.0, CHCl<sub>3</sub>).

The *ee* was measured by Chiral HPLC analysis (Chiral S.S. Whelk, 1.0 mL/min, 254 nm, 5% EtOH in hexanes, *t<sub>r</sub>* (minor) = 20.66 min, *t<sub>r</sub>* (major) = 24.88 min, 81% *ee*).

#### Racemic sample

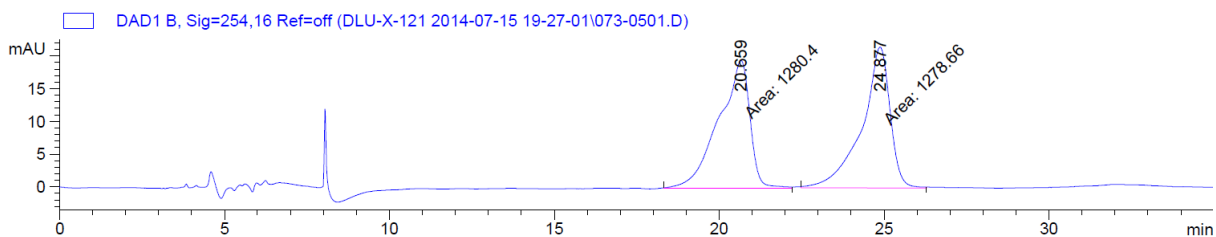

| Peak #   | RetTime [min] | Type | Width [min] | Area [mAU*s] | Height [mAU] | Area %  |
|----------|---------------|------|-------------|--------------|--------------|---------|
| 1        | 20.659        | MM   | 1.0946      | 1280.40137   | 19.49595     | 50.0340 |
| 2        | 24.877        | MM   | 0.9894      | 1278.66064   | 21.53968     | 49.9660 |
| Totals : |               |      |             | 2559.06201   | 41.03563     |         |

Enantio-enriched sample (81% *ee*)

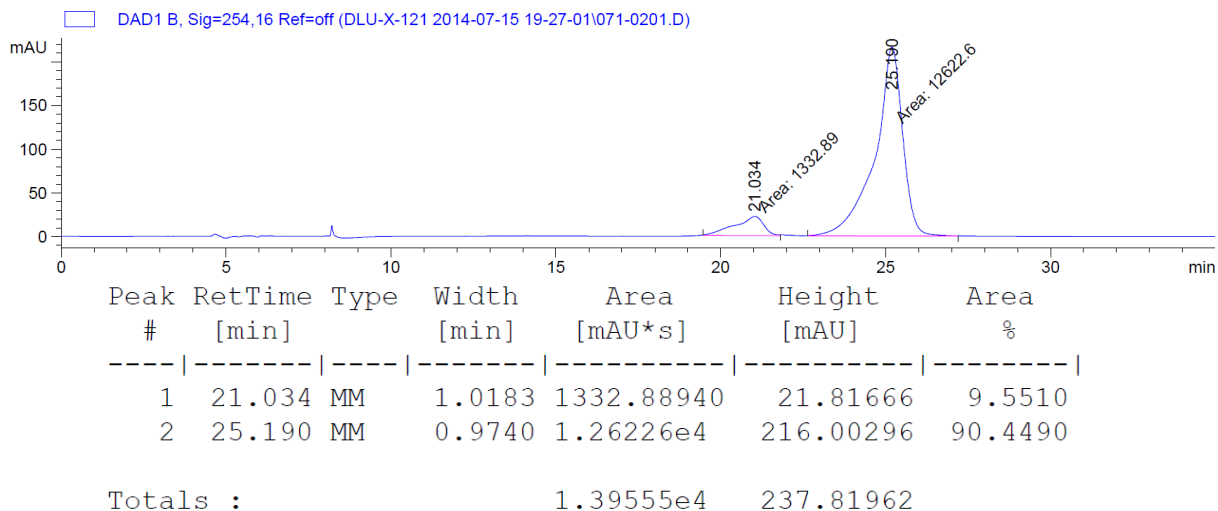

## b. Derivatization of **14**

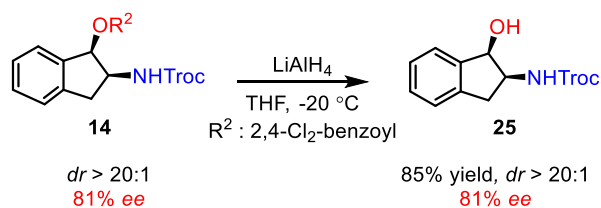

By following the aforementioned  $\text{LiAlH}_4$  reductive procedure, compound **14** can be selectively converted to 2-amino-1-indanol **25** without erosion of its *dr* and *ee* (85% yield).

$[\alpha]_{\text{D}}^{20} = +23.2$  (c 1.0,  $\text{CHCl}_3$ ).

The *ee* was determined by Chiral HPLC analysis (Chiral *S.S.* Whelk, 1.0 mL/min, 265 nm, 15% EtOH in hexanes,  $t_{\text{r}}$  (major) = 12.24 min,  $t_{\text{r}}$  (minor) = 16.74 min (81% *ee*).

The absolute chemistry was determined by comparison of the rotation data of 2-amino indanol obtained after zinc dust reduction with literature precedent.<sup>2</sup>

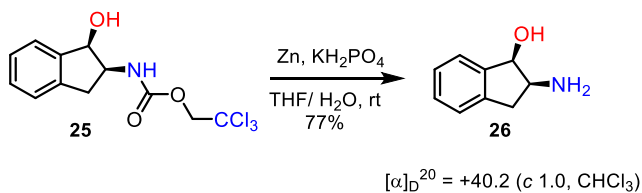

Racemic sample

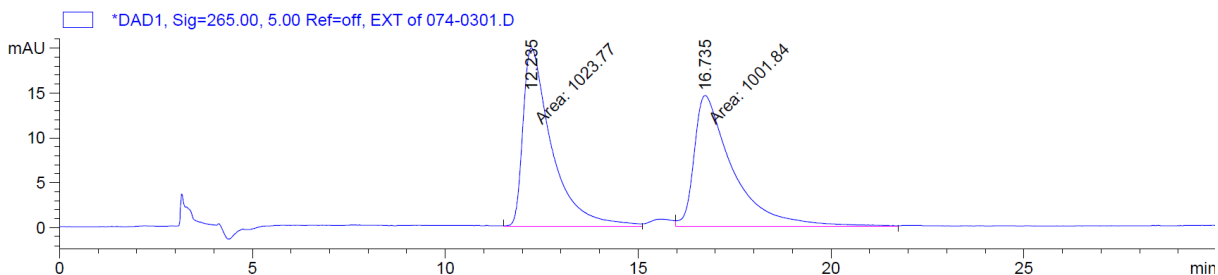

| Peak #   | RetTime [min] | Type | Width [min] | Area [mAU*s] | Height [mAU] | Area %  |
|----------|---------------|------|-------------|--------------|--------------|---------|
| 1        | 12.235        | MF   | 0.8602      | 1023.76611   | 19.83623     | 50.5412 |
| 2        | 16.735        | FM   | 1.1484      | 1001.84143   | 14.53924     | 49.4588 |
| Totals : |               |      |             | 2025.60754   | 34.37547     |         |

Enantio-enriched sample (81% ee)

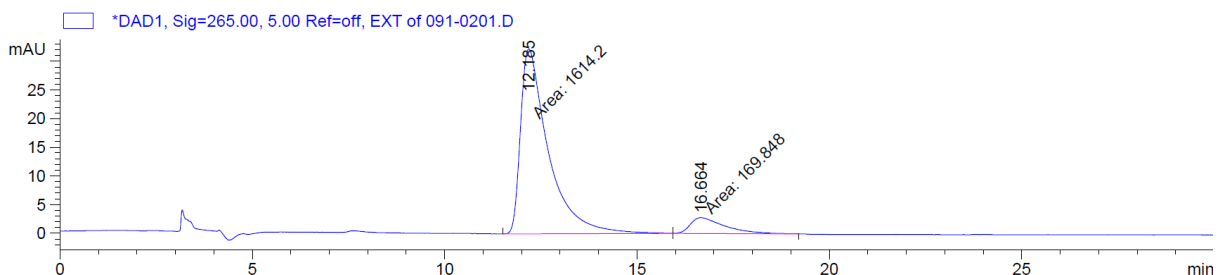

| Peak #   | RetTime [min] | Type | Width [min] | Area [mAU*s] | Height [mAU] | Area %  |
|----------|---------------|------|-------------|--------------|--------------|---------|
| 1        | 12.185        | MM   | 0.8342      | 1614.19958   | 32.24887     | 90.4796 |
| 2        | 16.664        | MM   | 1.0289      | 169.84776    | 2.75140      | 9.5204  |
| Totals : |               |      |             | 1784.04735   | 35.00026     |         |

### C. Iron-Catalyzed Amino-Oxygenation of Isomeric $\beta$ -Methyl Styrenes

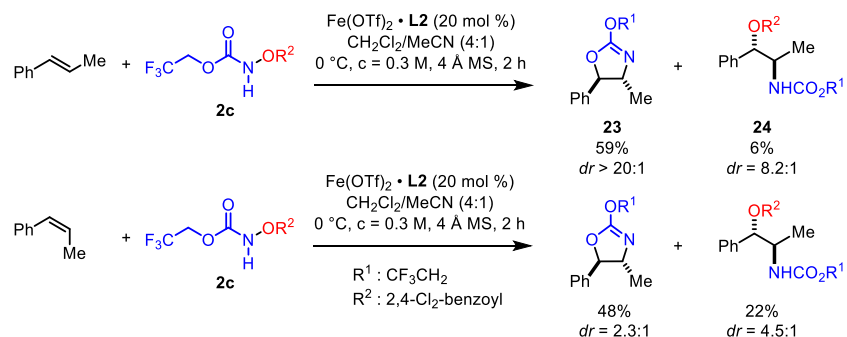

Both *trans* and *cis*  $\beta$ -methylstyrene are commercially available and they were distilled before usage.

To a flame-dried sealable 2-dram vial (vial **A**) equipped with a stir bar were added  $\text{Fe}(\text{OTf})_2$  (28.3 mg, 0.08 mmol) and **L2** (22.2 mg, 0.08 mmol). After the vial was evacuated and backfilled with  $\text{N}_2$  for three times, anhydrous  $\text{CH}_2\text{Cl}_2$  (0.7 mL) and MeCN (0.5 mL) were added via a syringe and the mixture was stirred at room temperature for 20 min. To another flame dried 2-dram vial (vial **B**) equipped with a stir bar were added activated 4Å molecular sieves (100 mg) and **2c** (132.8 mg, 0.40 mmol). The vial was also was evacuated and backfilled with  $\text{N}_2$  for three times and then anhydrous  $\text{CH}_2\text{Cl}_2$  (0.8 mL) was added via a syringe. Both solutions were degassed with brief evacuation and backfilling with  $\text{N}_2$  twice. Then, *trans*- or *cis*- $\beta$ -methyl styrene (94.6 mg, 0.8 mmol) was added to vial **B** and the catalyst solution (vial **A**) was added by a syringe pump over 30 min to vial **B** at  $0\text{ }^\circ\text{C}$ . The reaction was kept stirring at the same temperature until it was completed (another 1.5 h for *trans* and 2.5 h for *cis*). The reaction was quenched with saturated  $\text{NaHCO}_3$  aqueous solution (2 mL) and stirred vigorously for additional 10 min. The organic layer was separated and the aqueous phase was extracted with  $\text{CH}_2\text{Cl}_2$  (2 mL  $\times$  2) and EtOAc (2 mL  $\times$  2). The combined organic layers were dried over anhydrous  $\text{Na}_2\text{SO}_4$  and concentrated *in vacuo*.

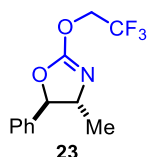

**anti-4-Methyl-5-phenyl-2-(2,2,2-trifluoroethoxy)-4,5-dihydrooxazole (23)**: compound **23** was isolated through a silica gel flash column (hexanes (buffered with 1% TEA)/acetone: from 50:1 to 10:1) from the reaction of *trans*- $\beta$ -methyl styrene as colorless oil (61.2 mg, 59% yield); IR

$\nu_{\max}$  (neat)/ $\text{cm}^{-1}$ : 2967 (w), 1761 (s), 1421 (m), 1345 (m), 1264 (s), 1166 (s);  $^1\text{H}$  NMR (400 MHz,  $\text{CDCl}_3$ )  $\delta$  7.48 – 7.30 (m, 5H), 5.16 (d,  $J = 7.5$  Hz, 1H), 4.67 (q,  $J = 8.0$  Hz, 2H), 4.04 (p,  $J = 6.7$  Hz, 1H), 1.41 (d,  $J = 6.5$  Hz, 3H);  $^{13}\text{C}$  NMR (101 MHz,  $\text{CDCl}_3$ )  $\delta$  160.5, 138.8, 128.9, 126.7, 125.6, 122.5 (q,  $J = 277.6$  Hz), 90.5, 67.7, 66.2 (q,  $J = 37.1$  Hz), 21.6;  $^{19}\text{F}$  NMR (377 MHz,  $\text{CDCl}_3$ )  $\delta$  -74.26 (t,  $J = 8.2$  Hz); HRMS (ESI,  $m/z$ ): calcd for  $\text{C}_{12}\text{H}_{13}\text{F}_3\text{NO}_2^+$  [ $\text{M} + \text{H}^+$ ], 260.0893, found 260.0882.

The relative stereochemistry of **23** and **23-syn** was determined through *NOE* analysis for both diastereomers.

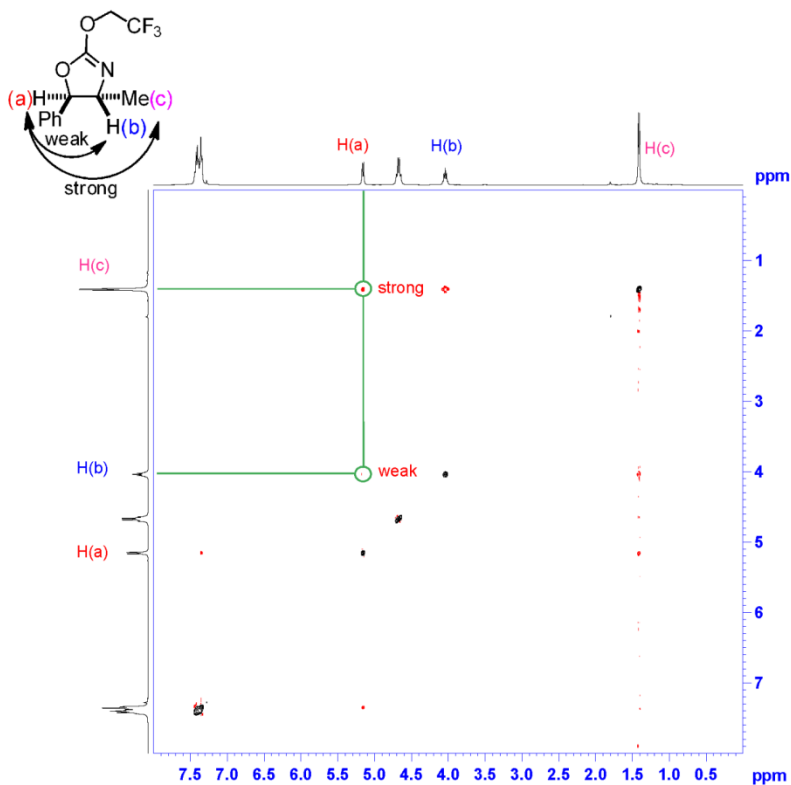

For the major (*anti*) diastereomer **23**: H(a) demonstrates a strong *NOE* with H(c), while it has a very weak *NOE* with H(b).

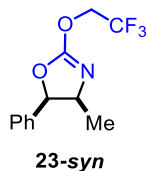



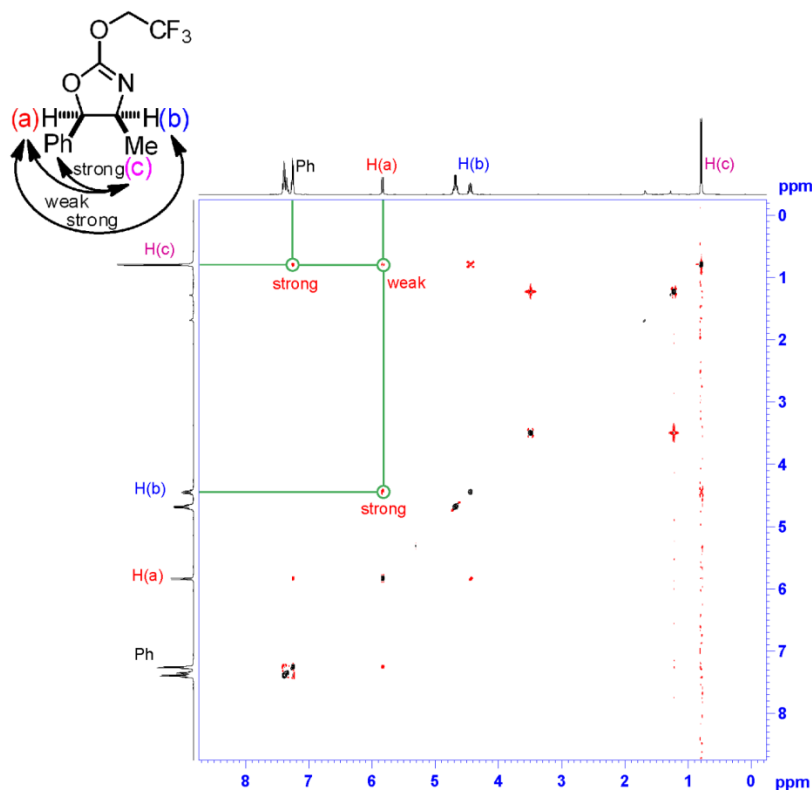

***syn*-4-Methyl-5-phenyl-2-(2,2,2-trifluoroethoxy)-4,5-dihydrooxazole (23-*syn*)**: compound **23-*syn*** was isolated through a silica gel flash column (hexanes (buffered with 1% TEA)/EtOAc: 50:1 to 5:1) from the reaction of *cis*- $\beta$ -methyl styrene as colorless oil (15.1 mg, 14% yield); IR  $\nu_{\max}$  (neat)/ $\text{cm}^{-1}$ : 2968 (w), 1761 (s), 1421 (m), 1343 (m), 1264 (s), 1167 (s);  $^1\text{H}$  NMR (400 MHz,  $\text{CDCl}_3$ )  $\delta$  7.45 – 7.31 (m, 3H), 7.31 – 7.19 (m, 2H), 5.84 (d,  $J = 9.1$  Hz, 1H), 4.76 – 4.59 (m, 2H), 4.45 (dq,  $J = 13.9, 6.9$  Hz, 1H), 0.79 (d,  $J = 6.9$  Hz, 3H);  $^{13}\text{C}$  NMR (101 MHz,  $\text{CDCl}_3$ )  $\delta$  161.2, 135.7, 128.4, 128.2, 125.8, 122.5 (d,  $J = 277.3$  Hz), 86.3, 66.2 (q,  $J = 37.1$  Hz), 62.7, 18.2;  $^{19}\text{F}$  NMR (377 MHz,  $\text{CDCl}_3$ )  $\delta$  -74.25 (t,  $J = 8.2$  Hz; HRMS (ESI,  $m/z$ ): calcd for  $\text{C}_{12}\text{H}_{13}\text{F}_3\text{NO}_2^+$  [ $\text{M} + \text{Na}^+$ ], 260.0893, found 260.0887;

For the minor (*syn*) diastereomer **23-*syn***: H(a) has a strong *NOE* with H(b), while the effect between it and H(c) is relatively weak. In addition, strong *NOE* is also observed between H(c) and protons in the aromatic region.

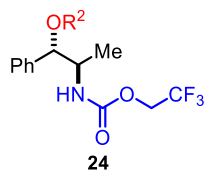

R<sup>2</sup>: 2,4-Cl<sub>2</sub>-benzoyl

***anti*-1-Phenyl-2-(((2,2,2-trifluoroethoxy)carbonyl)amino)propyl 2,4-dichlorobenzoate (**24**):**

compound **24** was isolated through a silica gel flash column (hexanes (buffered with 1% TEA)/acetone: from 50:1 to 10:1) from the reaction of *trans*- $\beta$ -methyl styrene as colorless oil (*anti*-diastereomer, 32.0 mg, 16% yield). IR  $\nu_{\text{max}}$  (neat)/cm<sup>-1</sup>: 3352 (w), 2977 (w), 1719 (s), 1585 (m), 1520 (m), 1279 (m), 1163 (s); <sup>1</sup>H NMR (400 MHz, CDCl<sub>3</sub>)  $\delta$  7.93 (d, *J* = 8.4 Hz, 1H), 7.52 (d, *J* = 1.6 Hz, 1H), 7.44 – 7.29 (m, 6H), 6.13 (d, *J* = 3.3 Hz, 1H), 5.12 (d, *J* = 9.0 Hz, 1H), 4.57 – 4.39 (m, 2H), 4.39 – 4.24 (m, 1H), 1.21 (d, *J* = 6.9 Hz, 3H); <sup>13</sup>C NMR (101 MHz, CDCl<sub>3</sub>)  $\delta$  163.9, 153.8, 138.8, 136.0, 134.9, 133.1, 131.2, 128.6, 128.5, 127.8, 127.2, 126.6, 79.0, 50.9, 15.7; <sup>19</sup>F NMR (377 MHz, CDCl<sub>3</sub>)  $\delta$  -74.25 (t, *J* = 8.5 Hz); HRMS (ESI, *m/z*): calcd for C<sub>19</sub>H<sub>16</sub>Cl<sub>2</sub>F<sub>3</sub>NNaO<sub>4</sub><sup>+</sup> [M + H<sup>+</sup>], 472.0301, found 472.0281.

**Determination of the Relative Stereochemistry of **24****

The relative stereochemistry of **24** was determined by comparison of the <sup>1</sup>H NMR data of its derivative with known compounds **27-*anti*** and **27-*syn***.<sup>3,4</sup> The oxazolidinone derived from **24** fits **27-*syn*** through <sup>1</sup>H NMR analysis; therefore, the relative stereochemistry of **24** was determined to be *anti*.

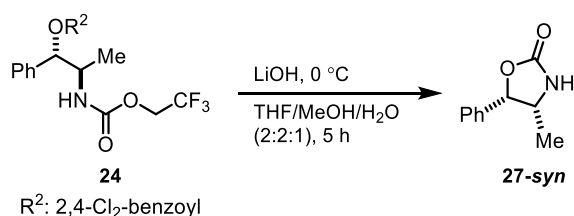

|                                                  |                                                                                                                                          |                                                                                                                             |                                                                                                                                      |
|--------------------------------------------------|------------------------------------------------------------------------------------------------------------------------------------------|-----------------------------------------------------------------------------------------------------------------------------|--------------------------------------------------------------------------------------------------------------------------------------|
|                                                  | 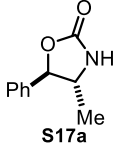<br>S17a<br>(Literature Data) <sup>3</sup>              | <br>S17b<br>(Literature Data) <sup>4</sup> | <br>(hydrolysis product obtained from <b>24</b> ) |
| <sup>1</sup> H NMR (400 MHz, CDCl <sub>3</sub> ) | $\delta$ 7.5-7.3 (m, 5H), 6.41 (br s, 1H), 5.04 (d, $J$ = 7.3 Hz, 1H), 3.84 (p, $J$ = 4 $\times$ 6.3 Hz, 1H), 1.39 (d, $J$ = 6.2 Hz, 3H) | $\delta$ 7.35 (m, 5H), 6.40 (bs, 1H), 5.71 (d, $J$ = 8.0, 1H), 4.21 (m, 1H), 0.81 (d, $J$ = 6.5, 3H).                       | $\delta$ 7.43 – 7.27 (m, 5H), 5.72 (d, $J$ = 7.9 Hz, 1H), 5.50 (br s, 1H), 4.20 (p, $J$ = 6.7 Hz, 1H), 0.81 (d, $J$ = 6.5 Hz, 1H).   |

#### D. Catalytic Indene Aminohydroxylation Using the Preformed Iron Catalyst

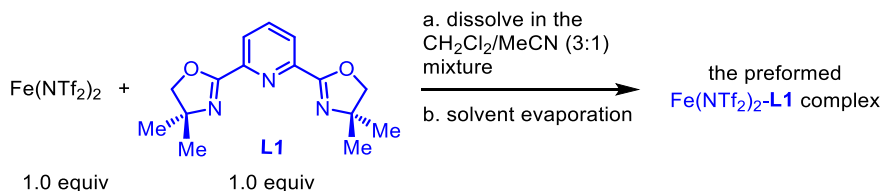

To a flame-dried sealable 3-dram vial equipped with a stir bar were added  $\text{Fe}(\text{NTf}_2)_2$  (307.5 mg, 0.5 mmol) and **L1** (136.5 mg, 0.5 mmol). After the vial was evacuated and backfilled with  $\text{N}_2$  three times, anhydrous  $\text{CH}_2\text{Cl}_2$  (6 mL) and MeCN (2 mL) were added and the mixture was stirred at room temperature for 1 h. The resulting solution was filtered through a cotton wool under  $\text{N}_2$  and the filtrate was concentrated and dried *in vacuo* to afford foam. The residue was suspended in anhydrous hexanes and sonicated. After removal of hexanes *in vacuo*, the orange solid can be used directly as the catalyst. Attempts were made to obtain the X-ray crystallographic analysis of the preformed  $\text{Fe}(\text{NTf}_2)_2\text{-L1}$  complex; however, it proved challenging.

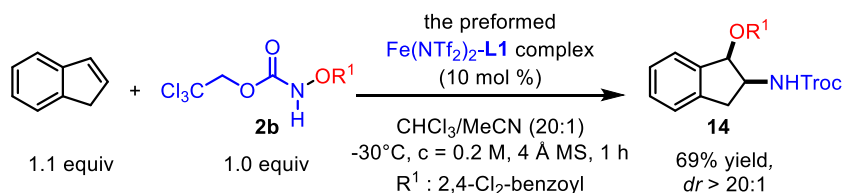

Indene aminohydroxylation using the pre-formed Fe(NTf<sub>2</sub>)<sub>2</sub>-L1 complex affords **14** (69% yield).

## E. References

- (1) Gutierrez, E. G.; Wong, C. J.; Sahin, A. H.; Franz, A. K. *Org. Lett.* **2011**, *13*, 5754.
- (2) Corey, E. J.; Roper, T. D.; Ishihara, K.; Sarakinos, G. *Tetrahedron Lett.* **1993**, *34*, 8399.
- (3) Johannes, M.; Altmann, K.-H. *Org. Lett.* **2012**, *14*, 3752.
- (4) Paz, J.; Pérez-Balado, C.; Iglesias, B.; Muñoz, L. *J. Org. Chem.* **2010**, *75*, 3037.

## F. NMR Spectra

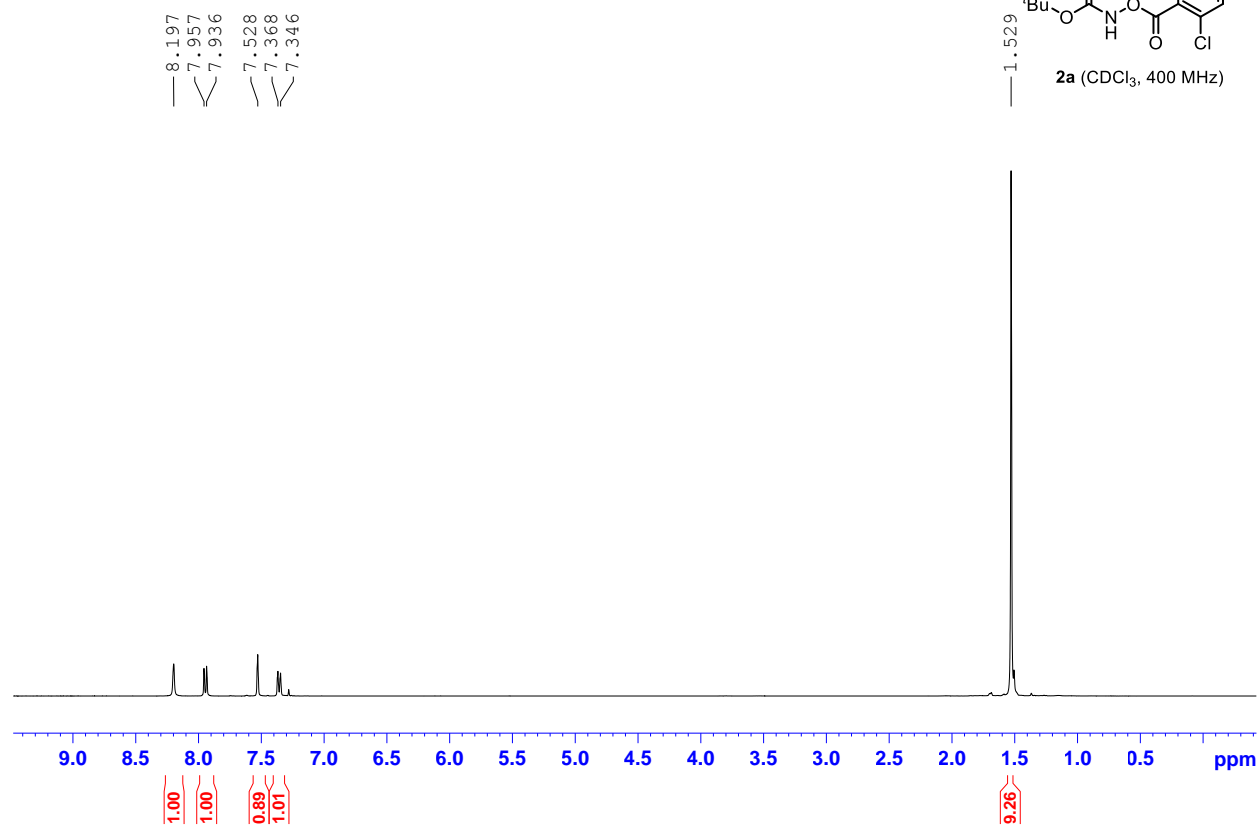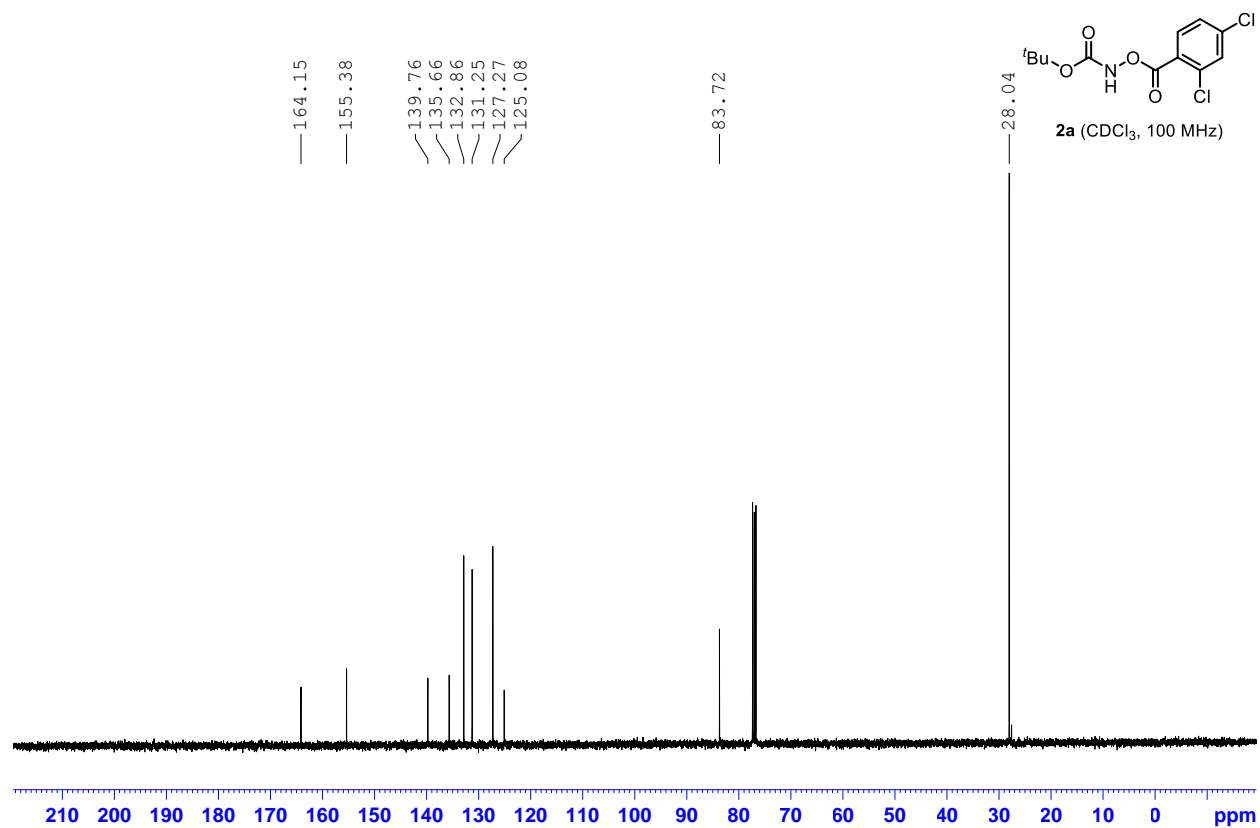

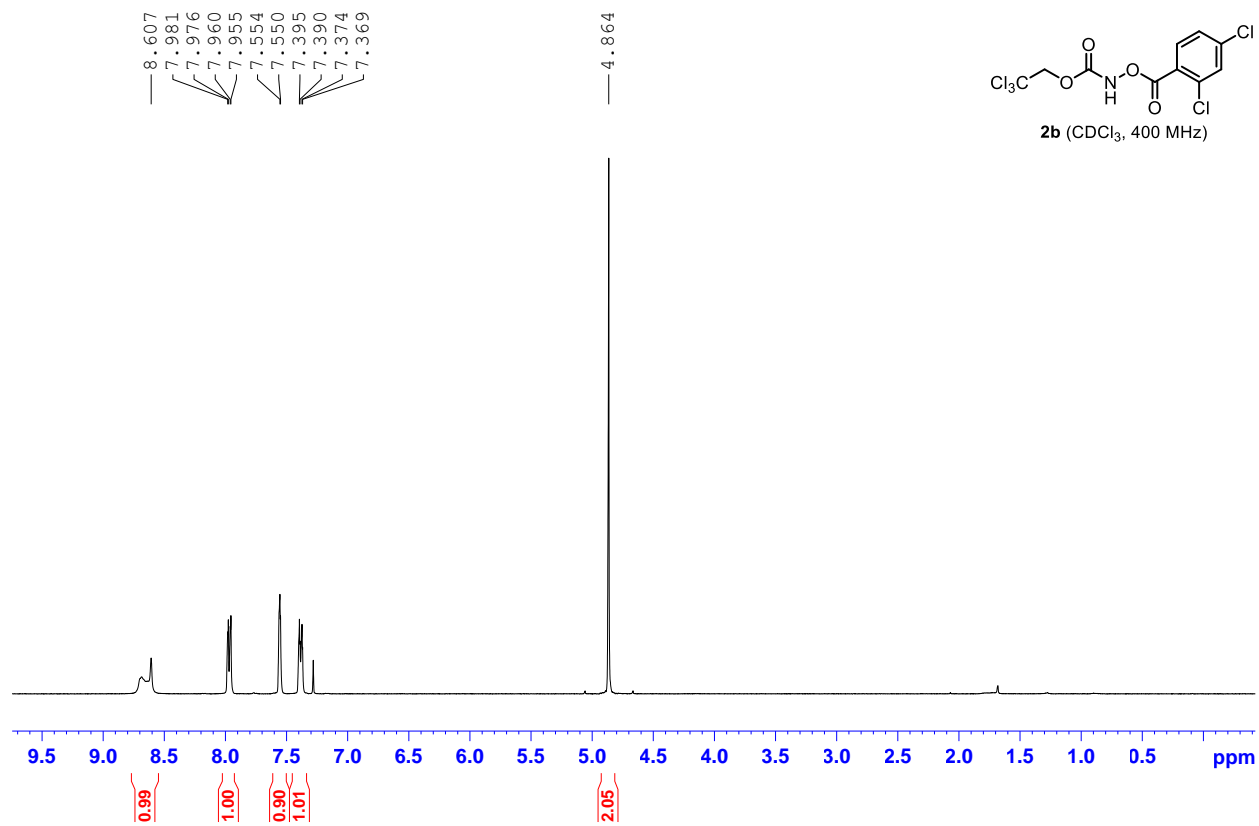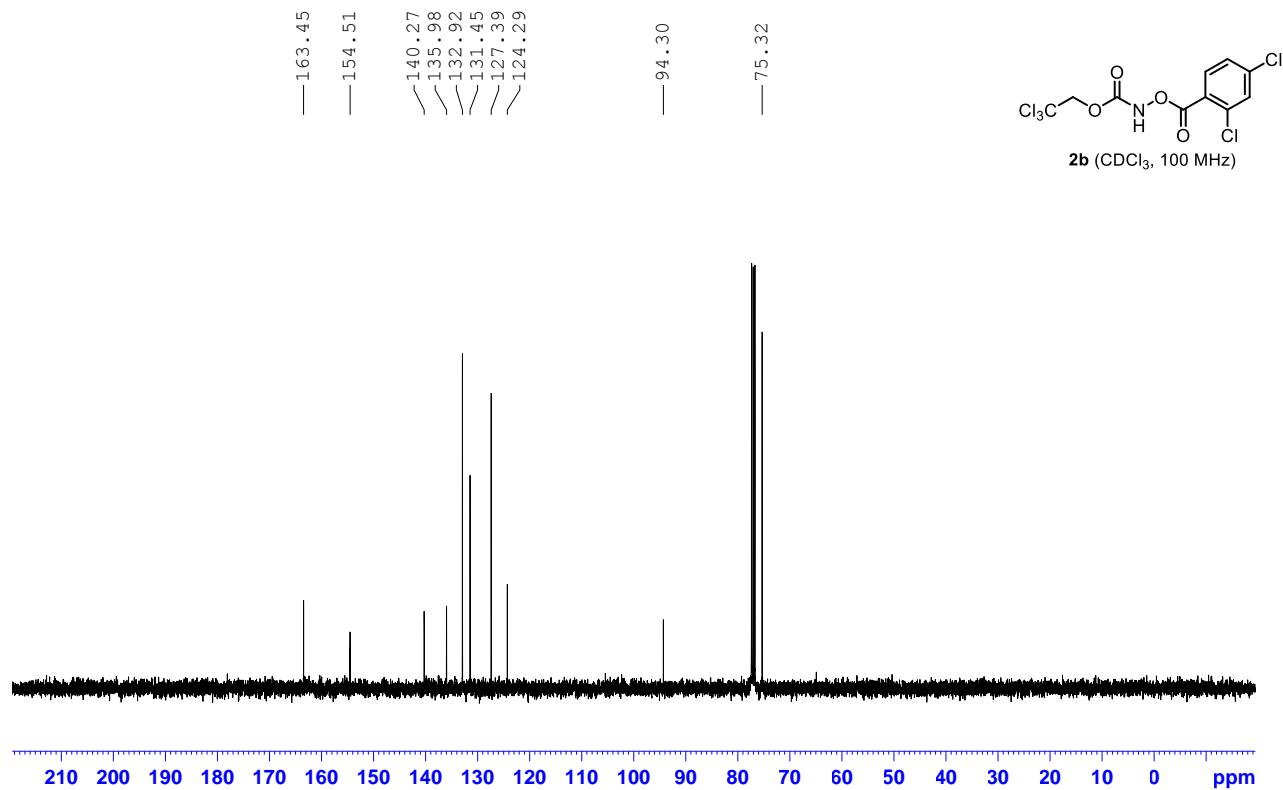

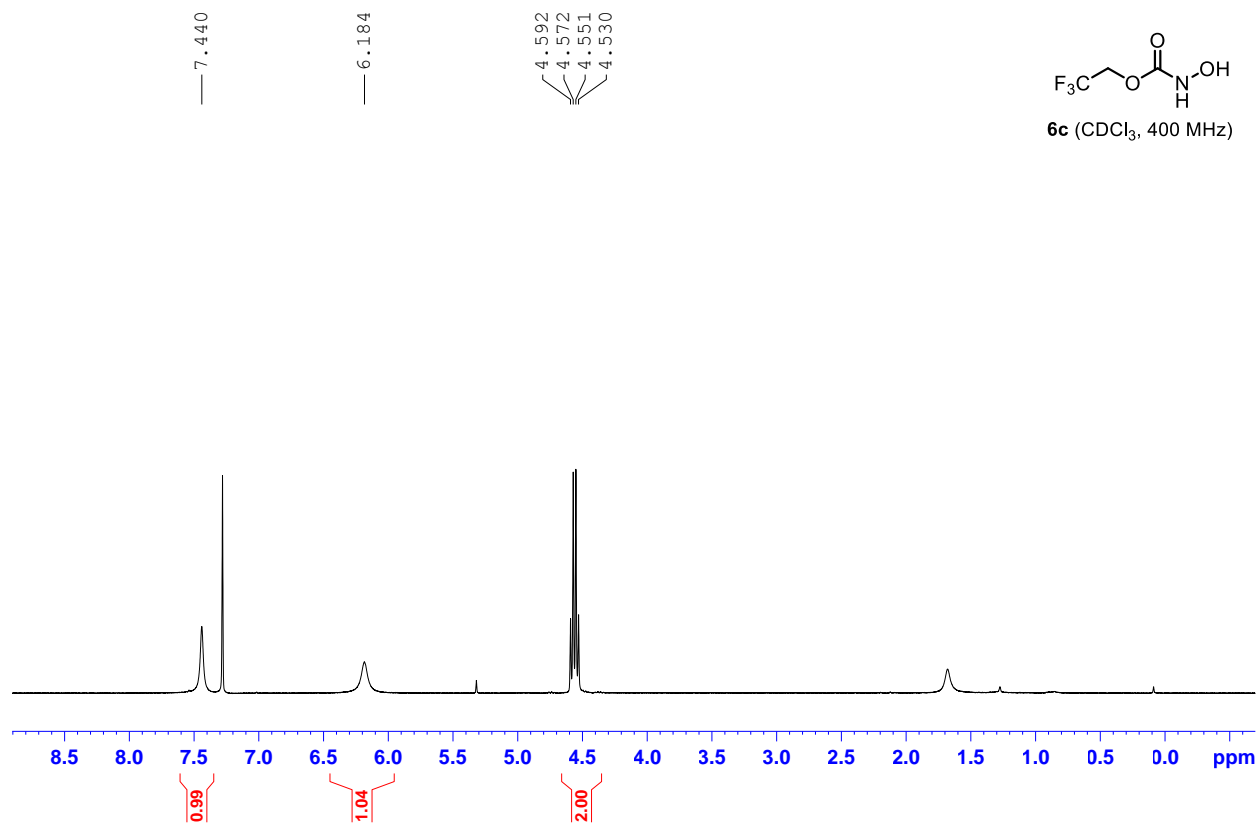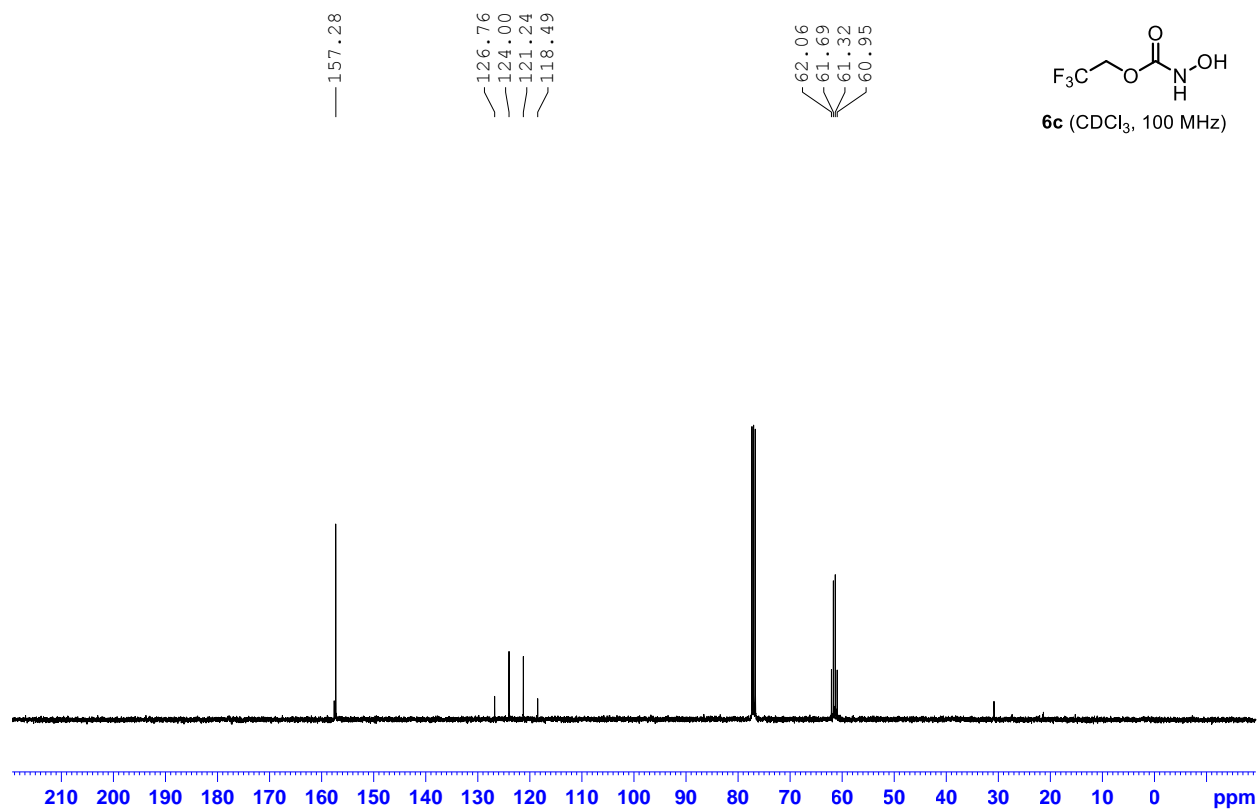

-74.39  
-74.41  
-74.43

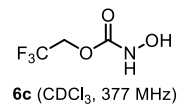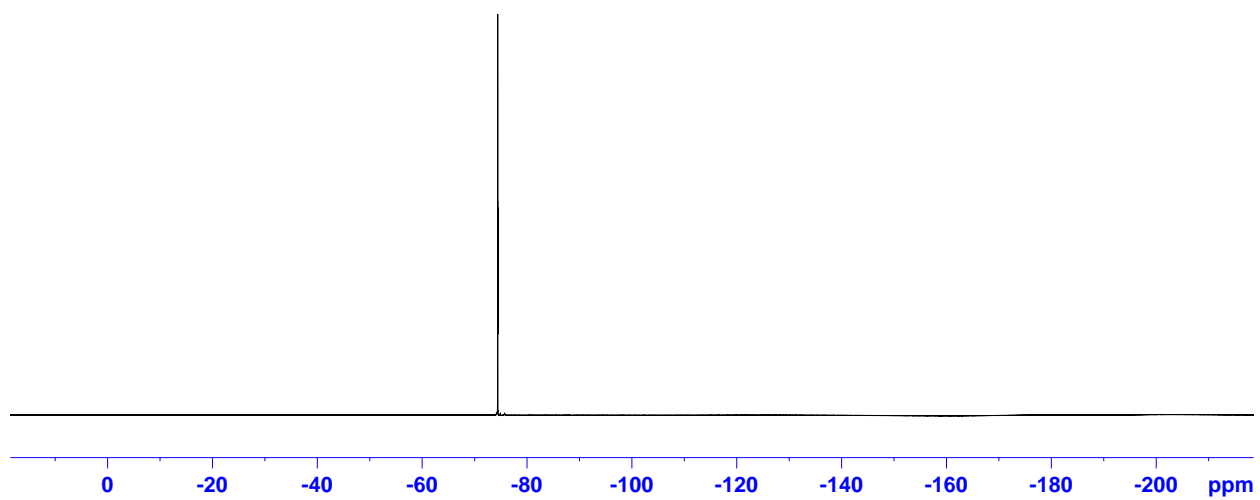



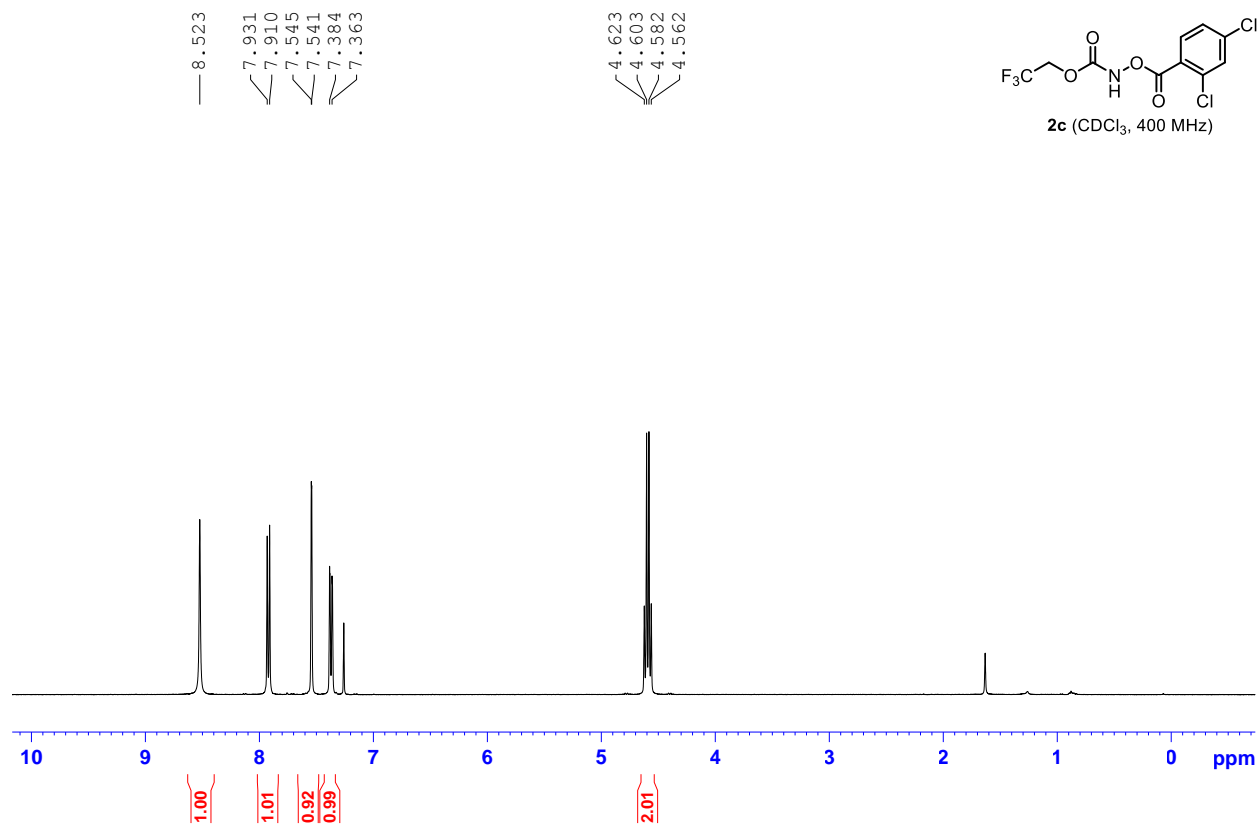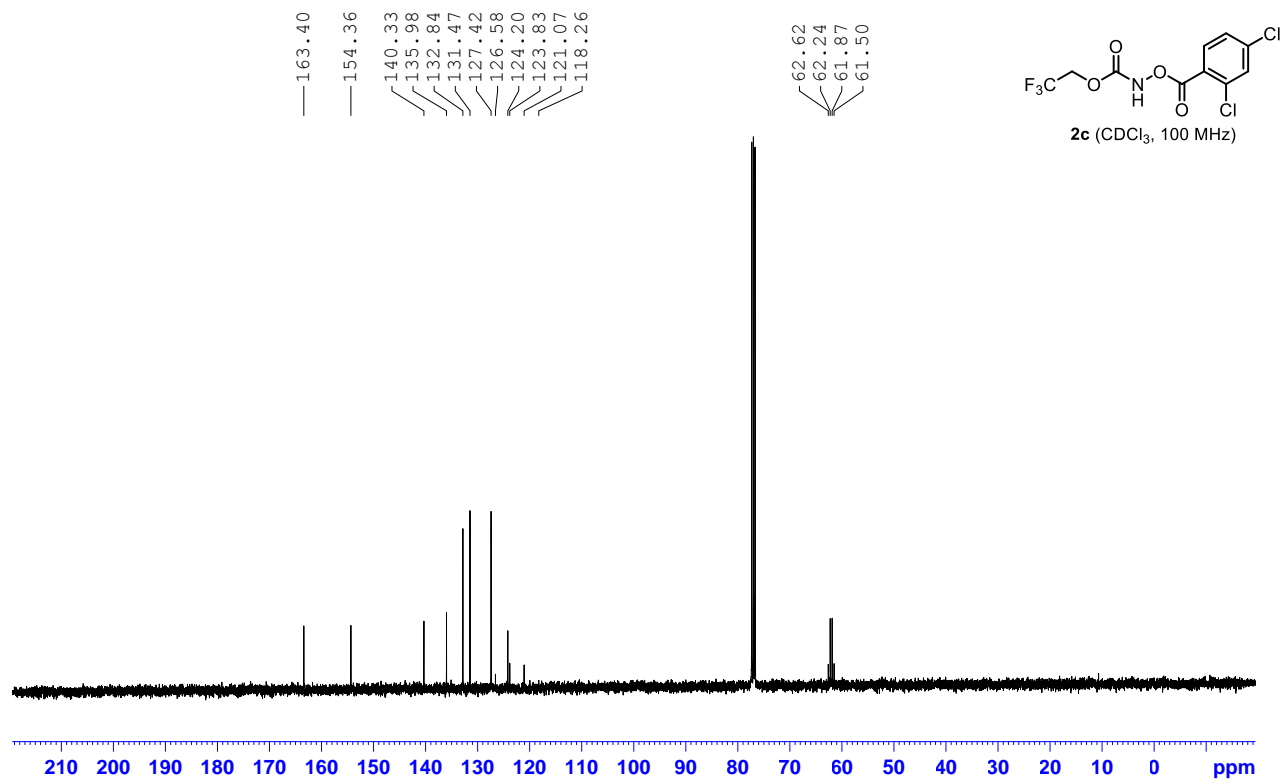

-74.08  
-74.10  
-74.12

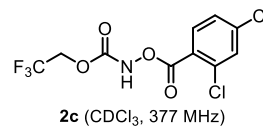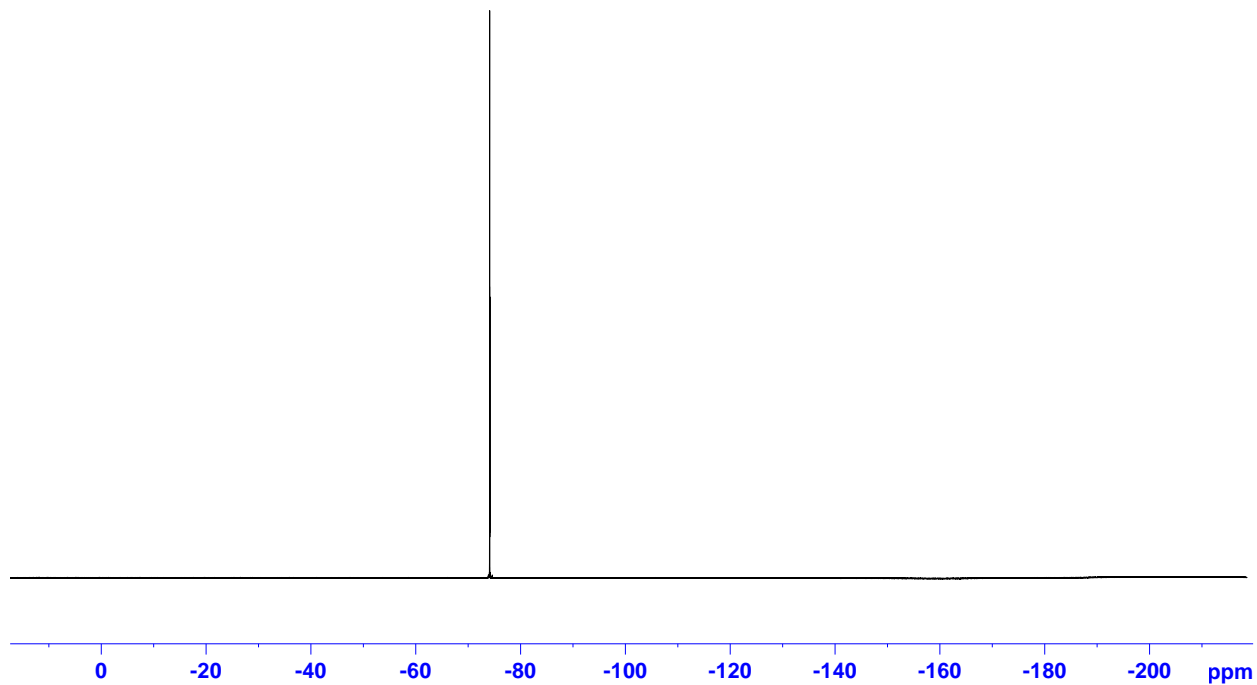

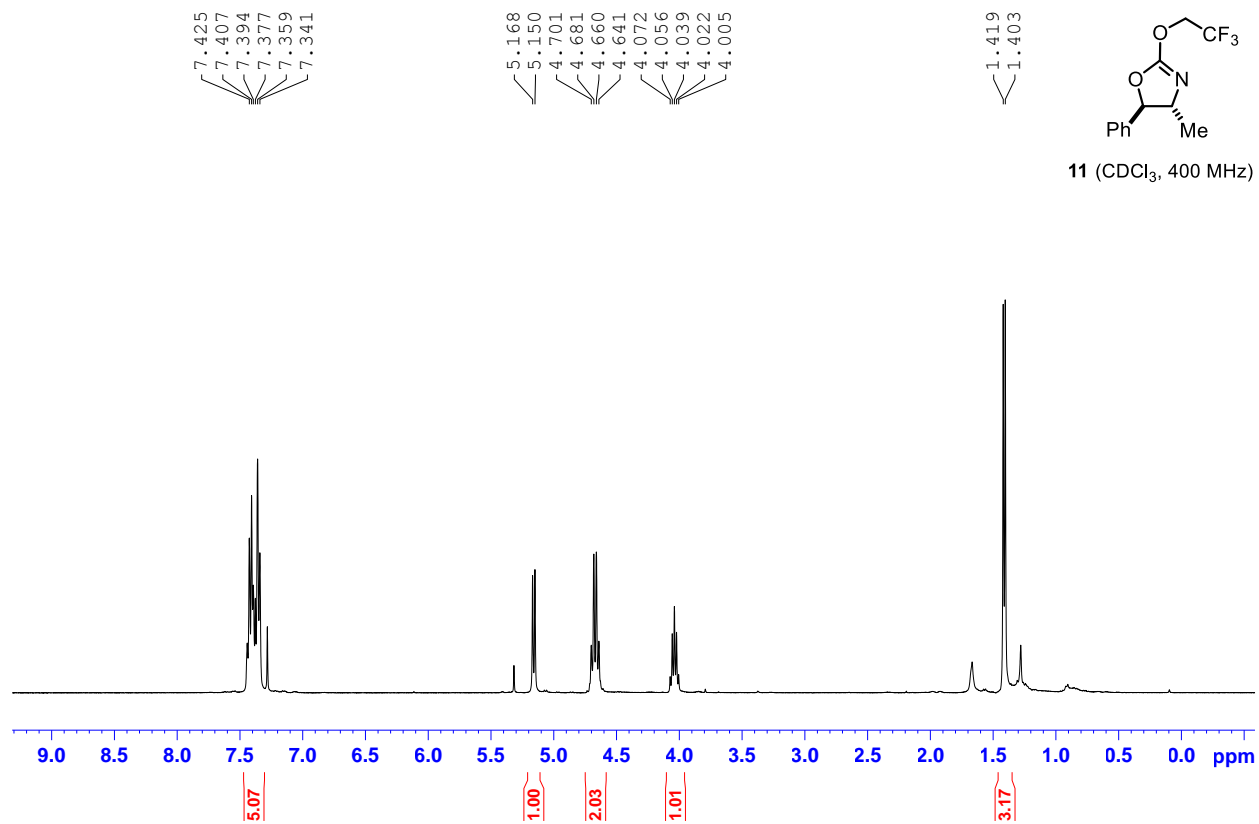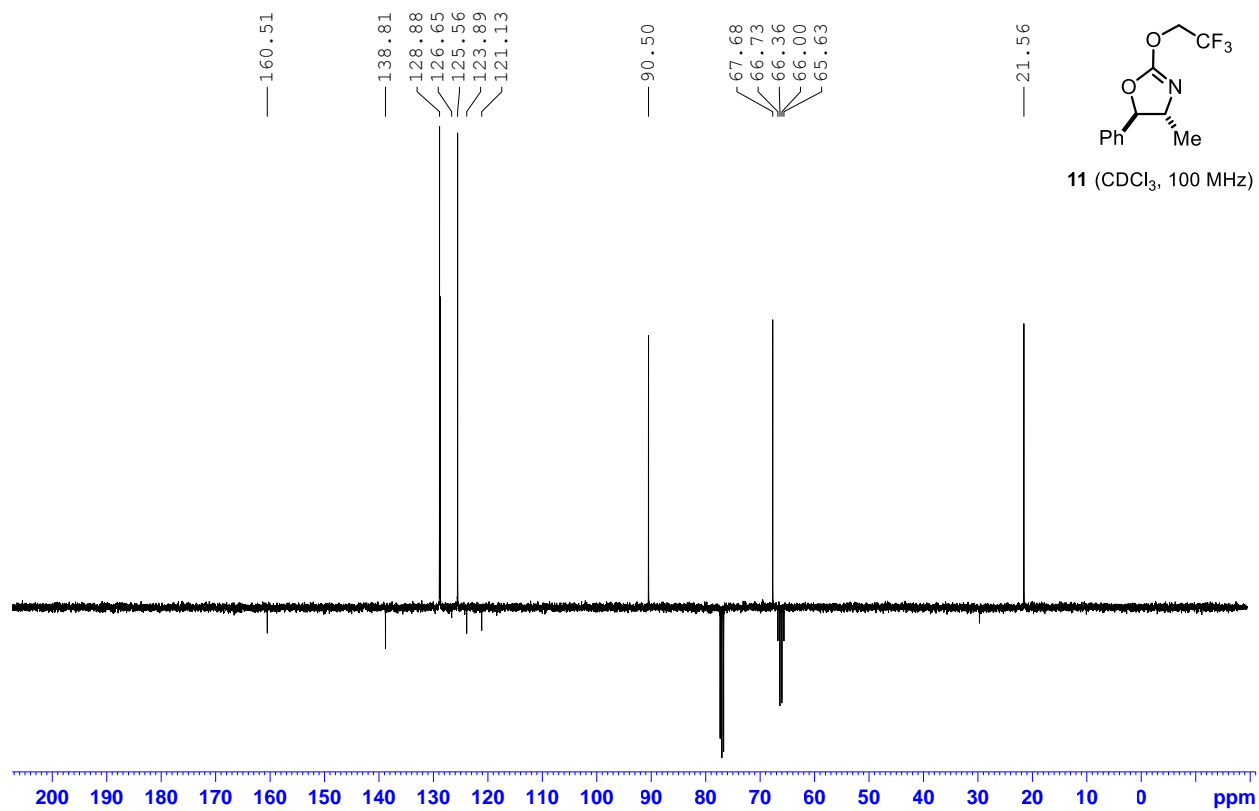

-74.24  
-74.26  
-74.28

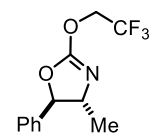

11 (CDCl<sub>3</sub>, 377 MHz)

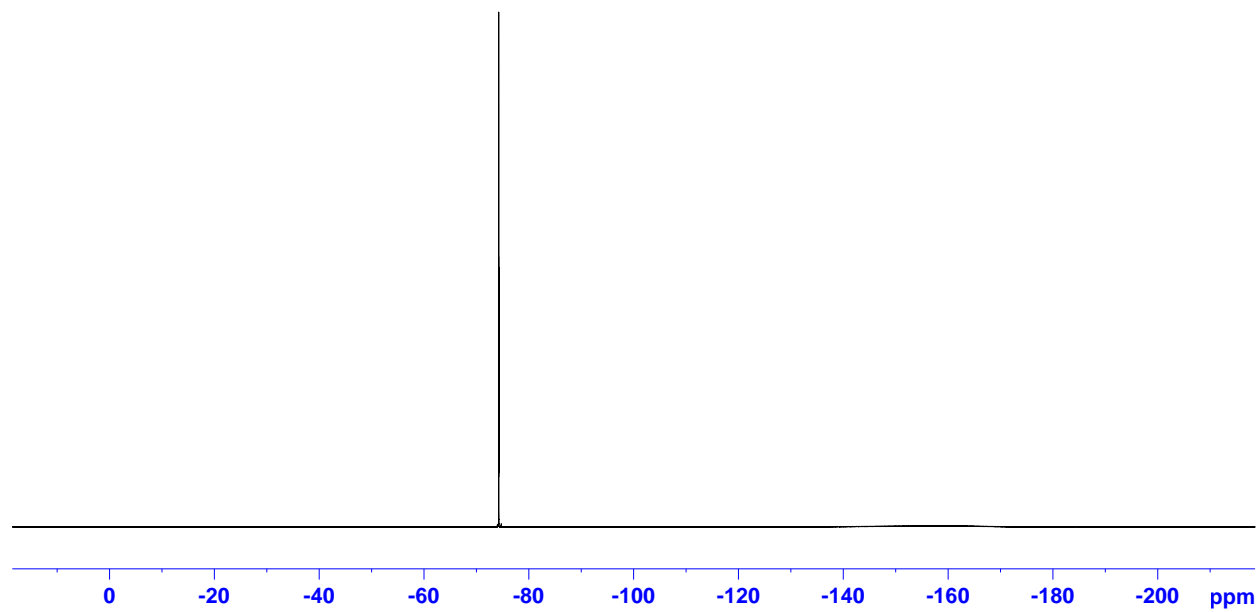

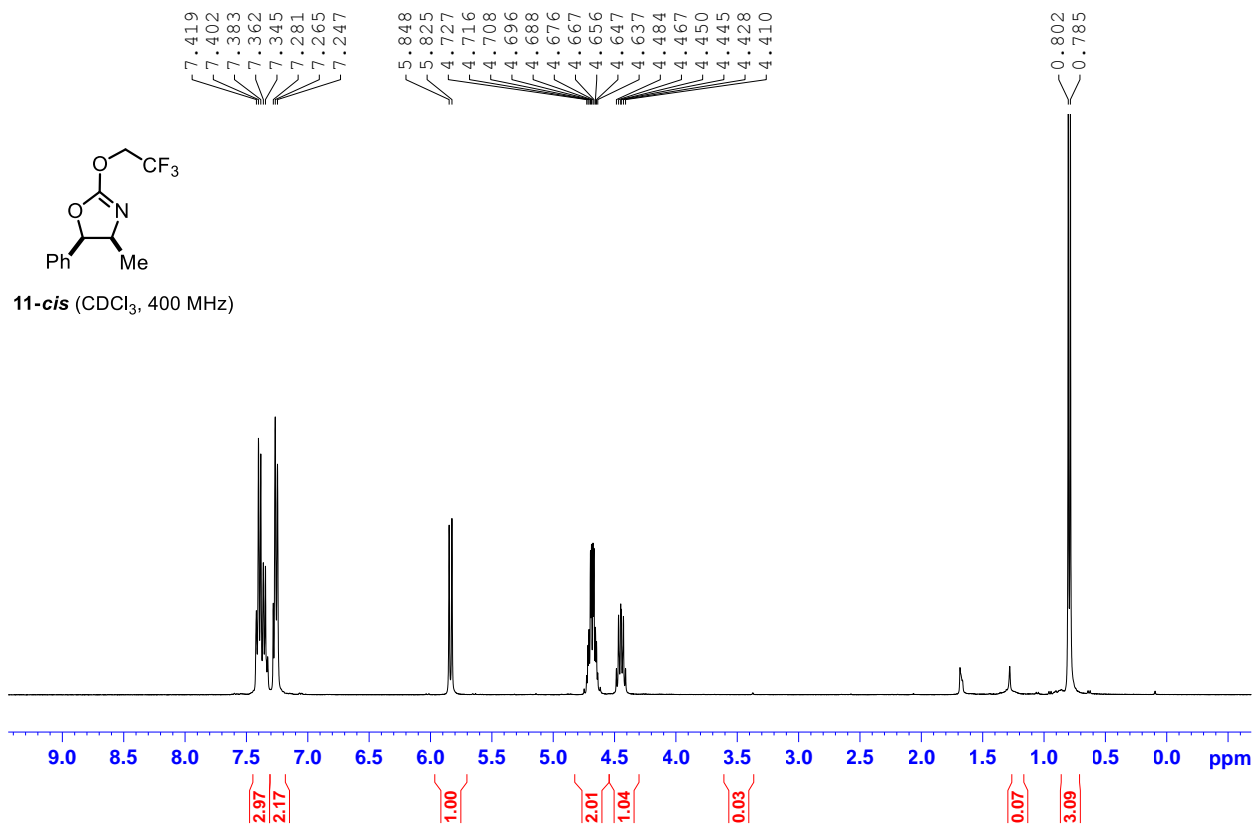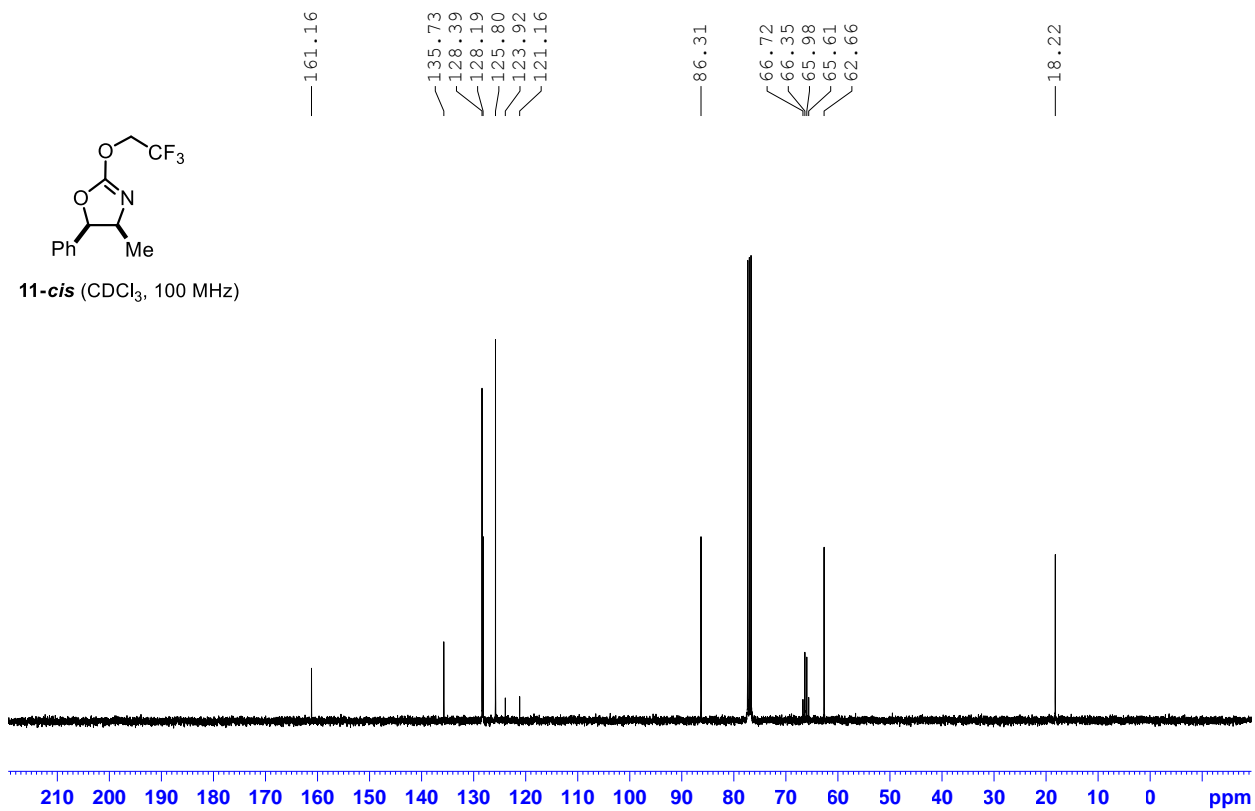

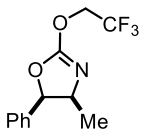

11-cis (CDCl<sub>3</sub>, 377 MHz)

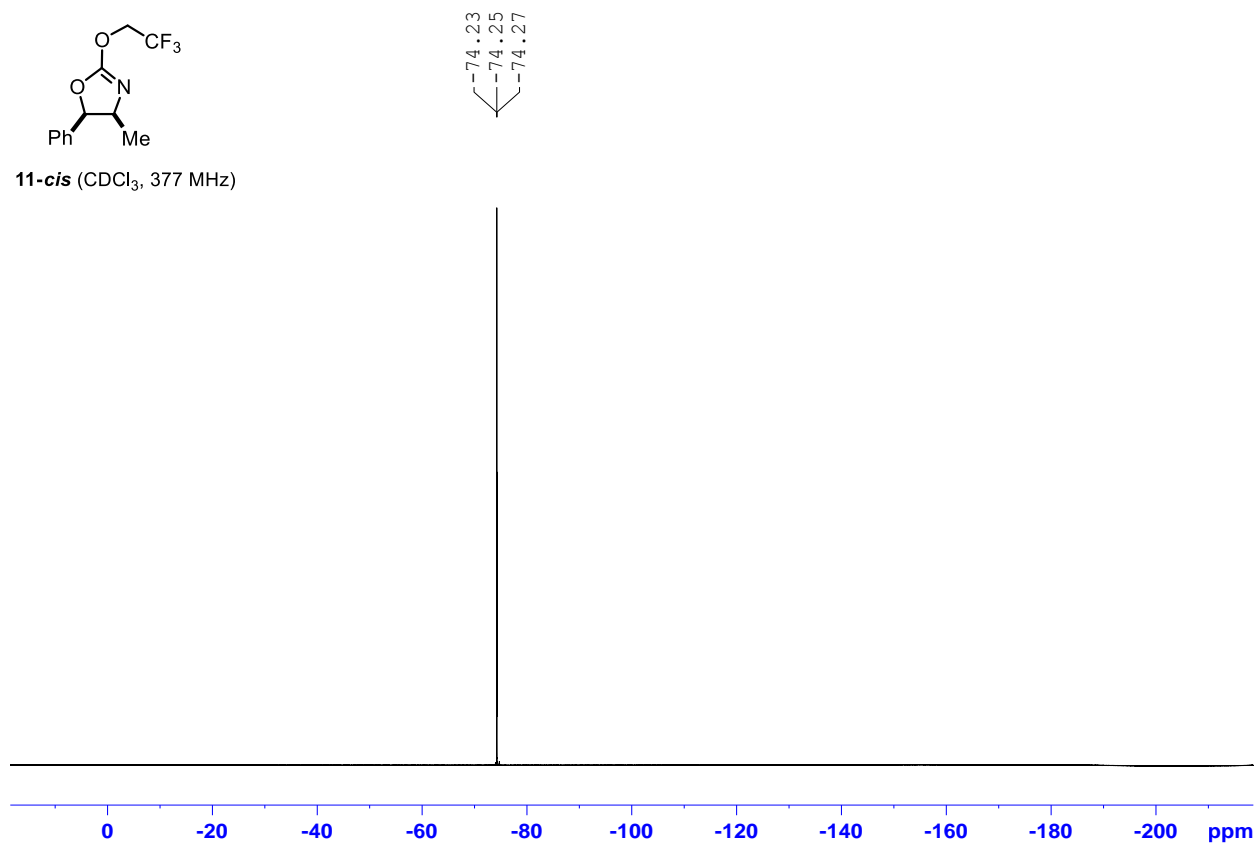

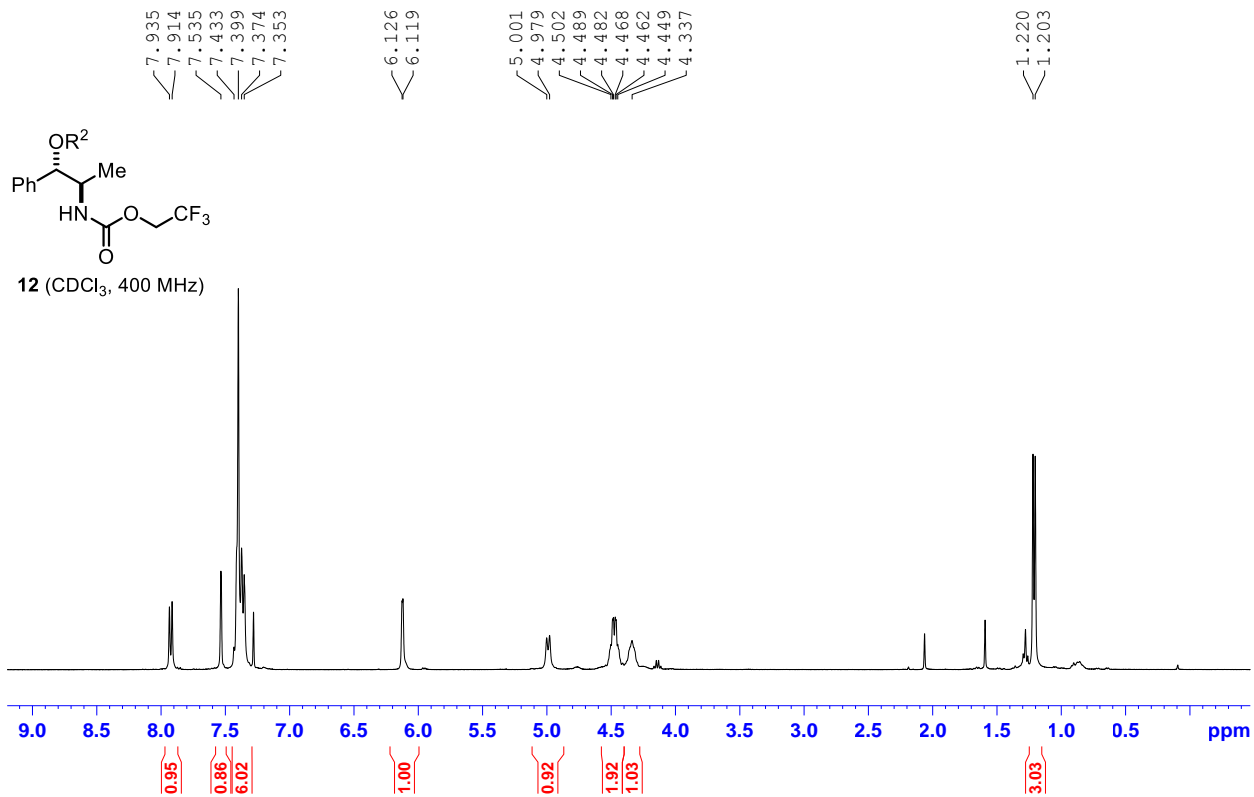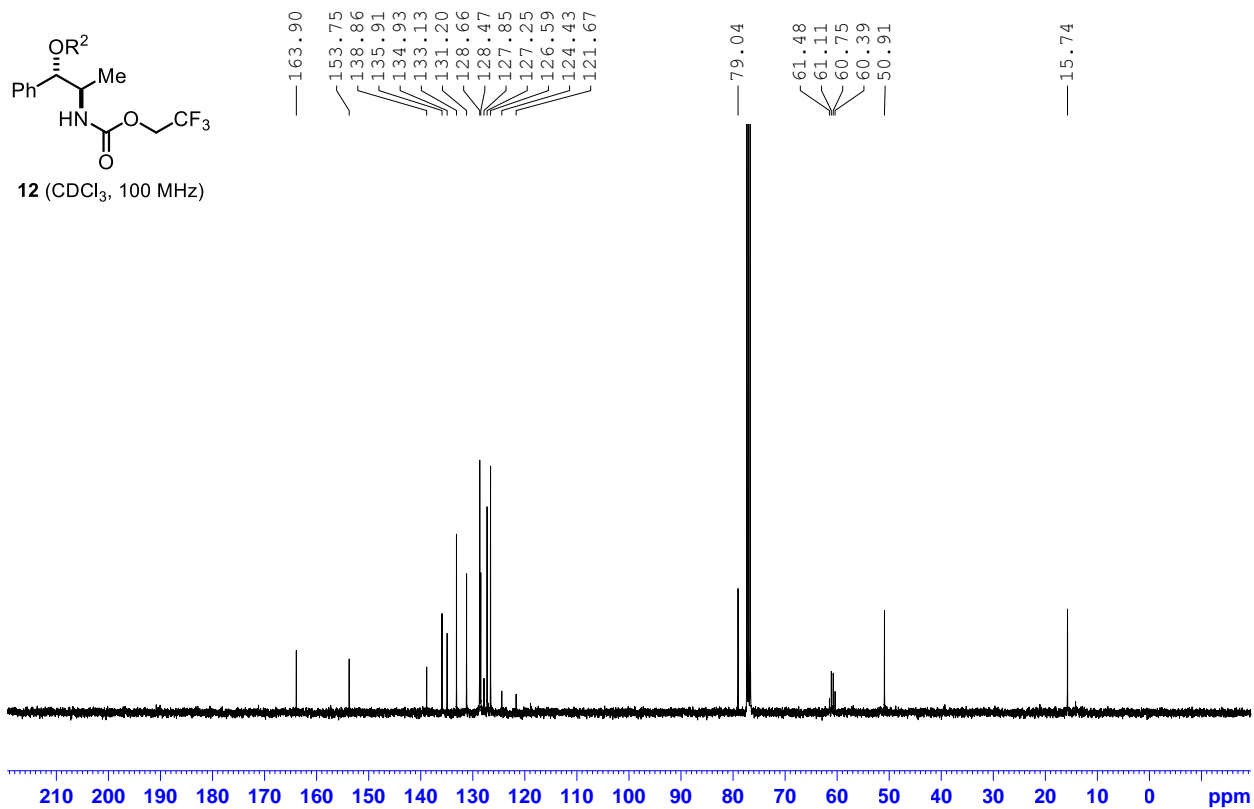

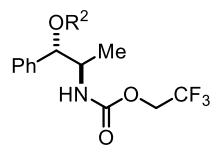

**12** (CDCl<sub>3</sub>, 377 MHz)

-74.23  
-74.25  
-74.27

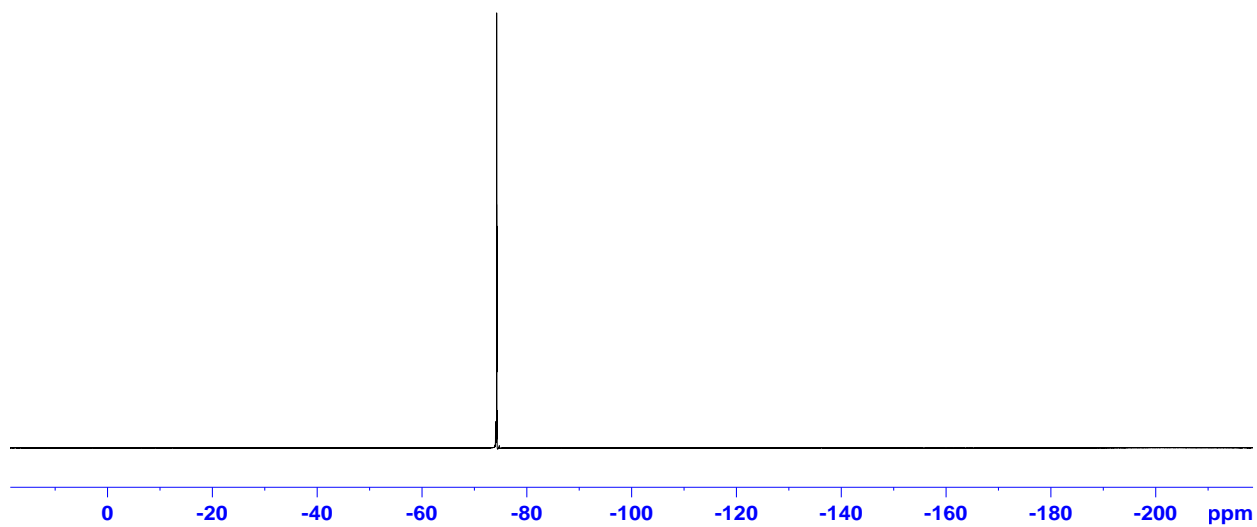



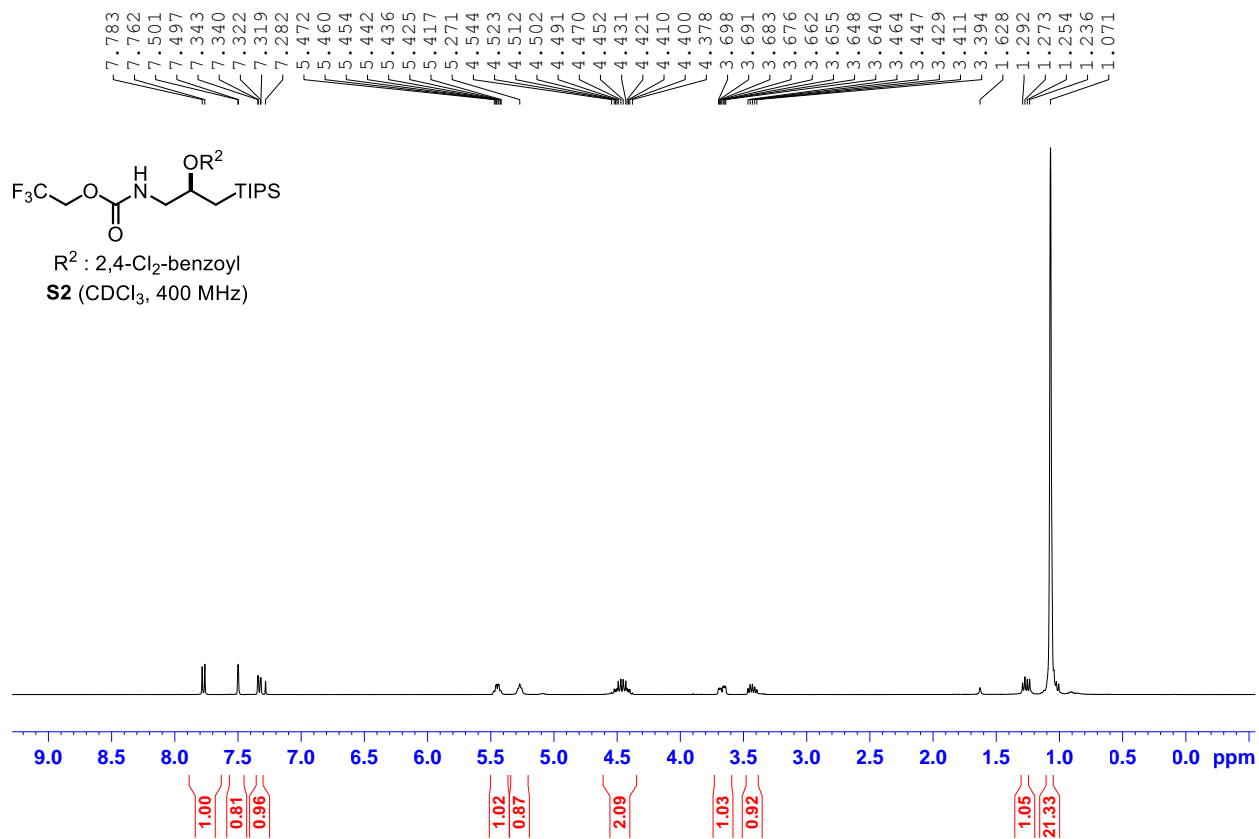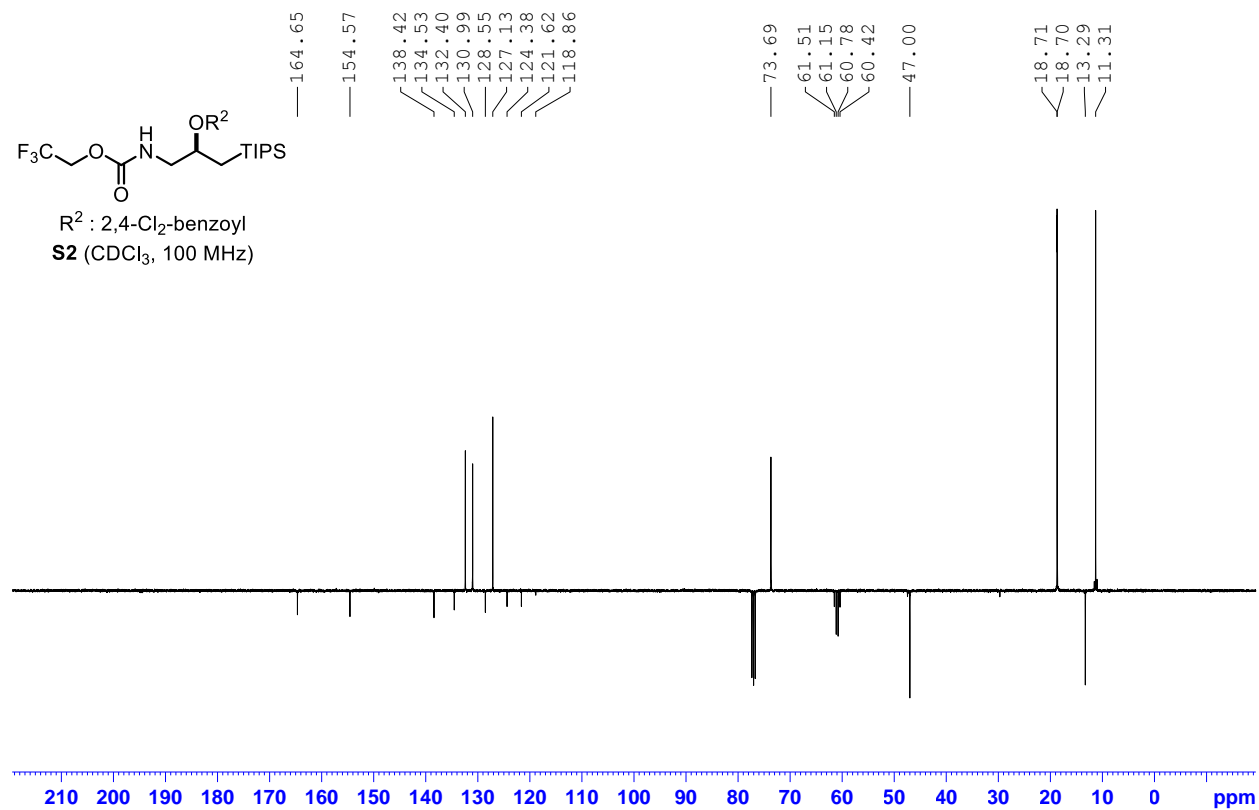

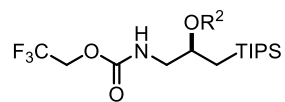

R<sup>2</sup> : 2,4-Cl<sub>2</sub>-benzoyl  
S2 (CDCl<sub>3</sub>, 377 MHz)

-74.32  
-74.34  
-74.37

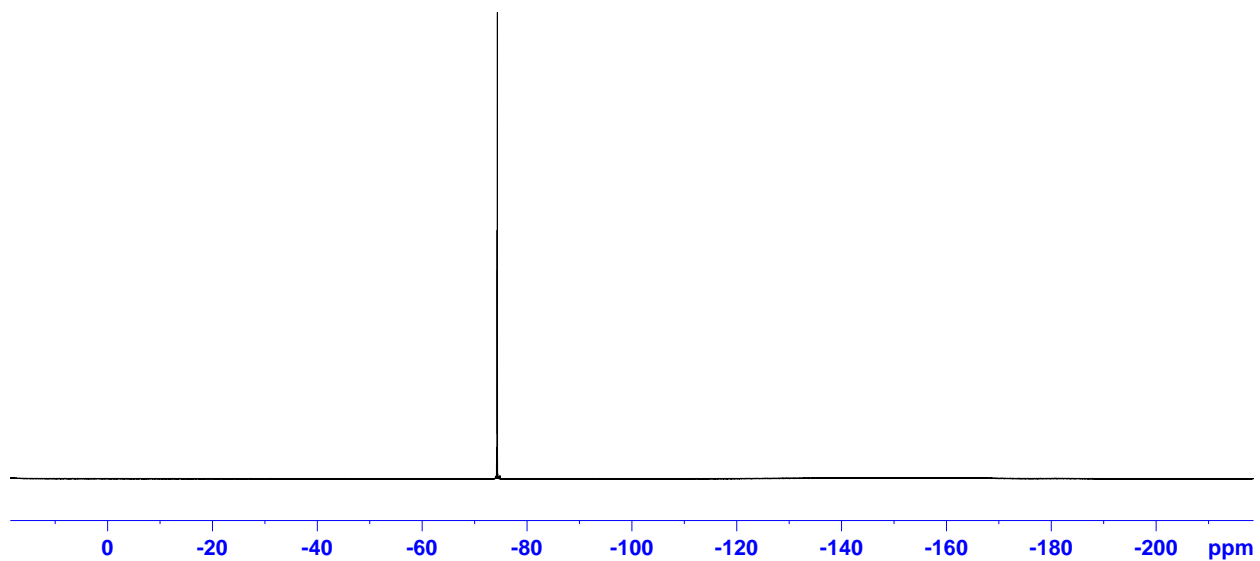

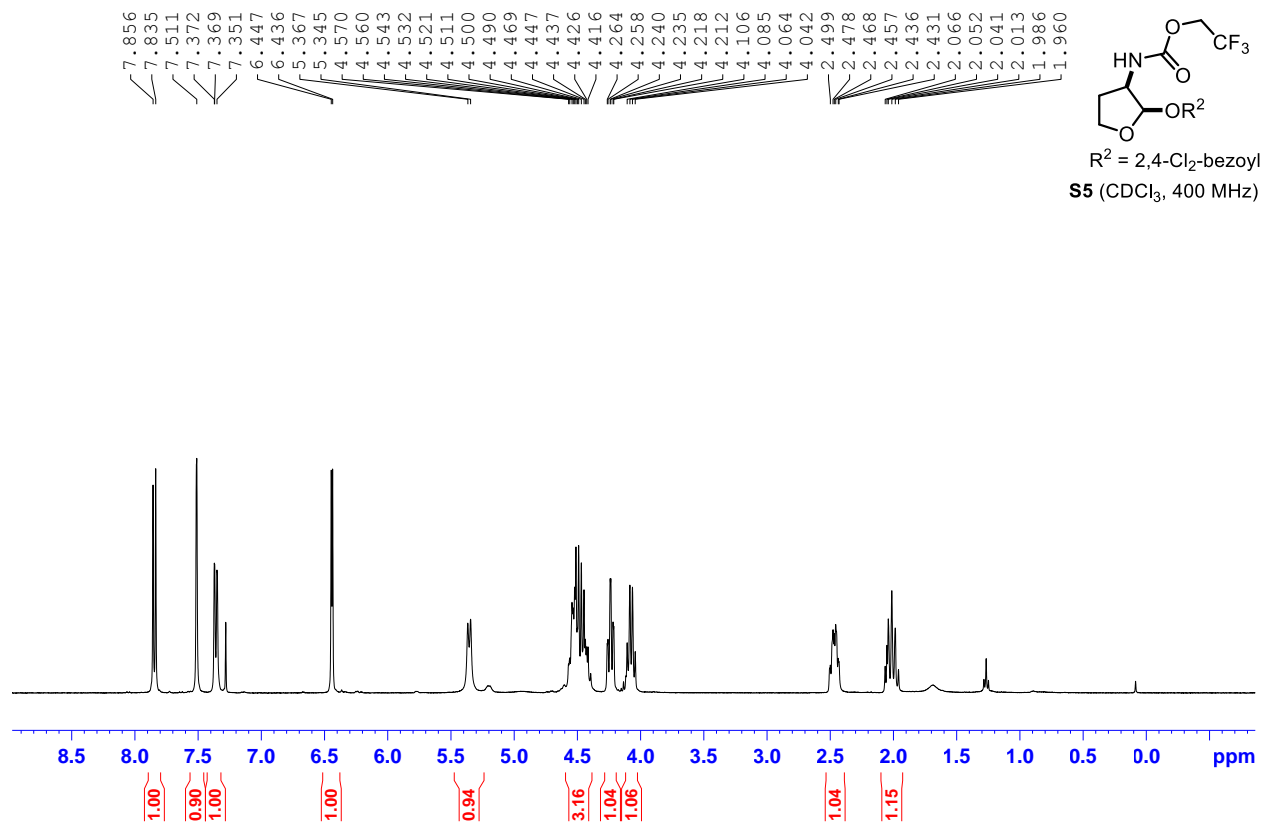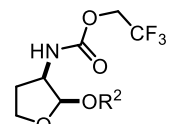

R<sup>2</sup> = 2,4-Cl<sub>2</sub>-benzoyl  
**S5** (CDCl<sub>3</sub>, 400 MHz)

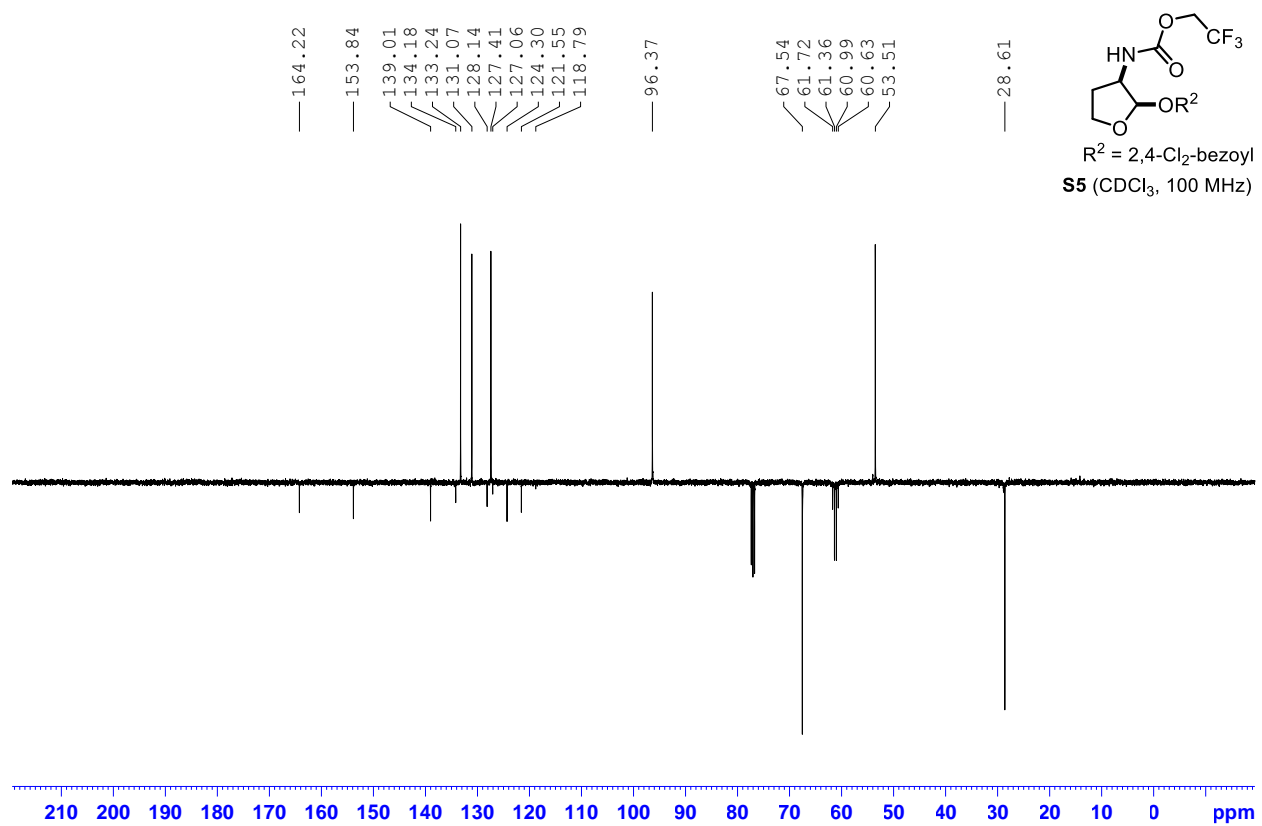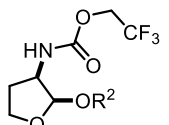

R<sup>2</sup> = 2,4-Cl<sub>2</sub>-benzoyl  
**S5** (CDCl<sub>3</sub>, 100 MHz)

-74.25  
-74.28  
-74.30

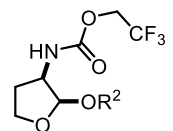

R<sup>2</sup> = 2,4-Cl<sub>2</sub>-benzoyl  
S5 (CDCl<sub>3</sub>, 377 MHz)

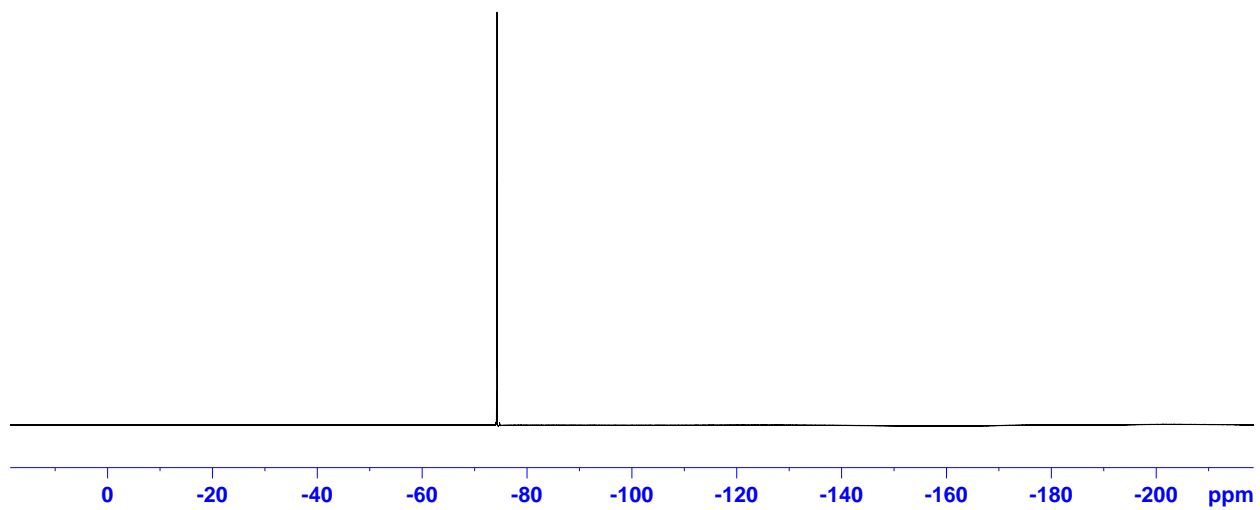

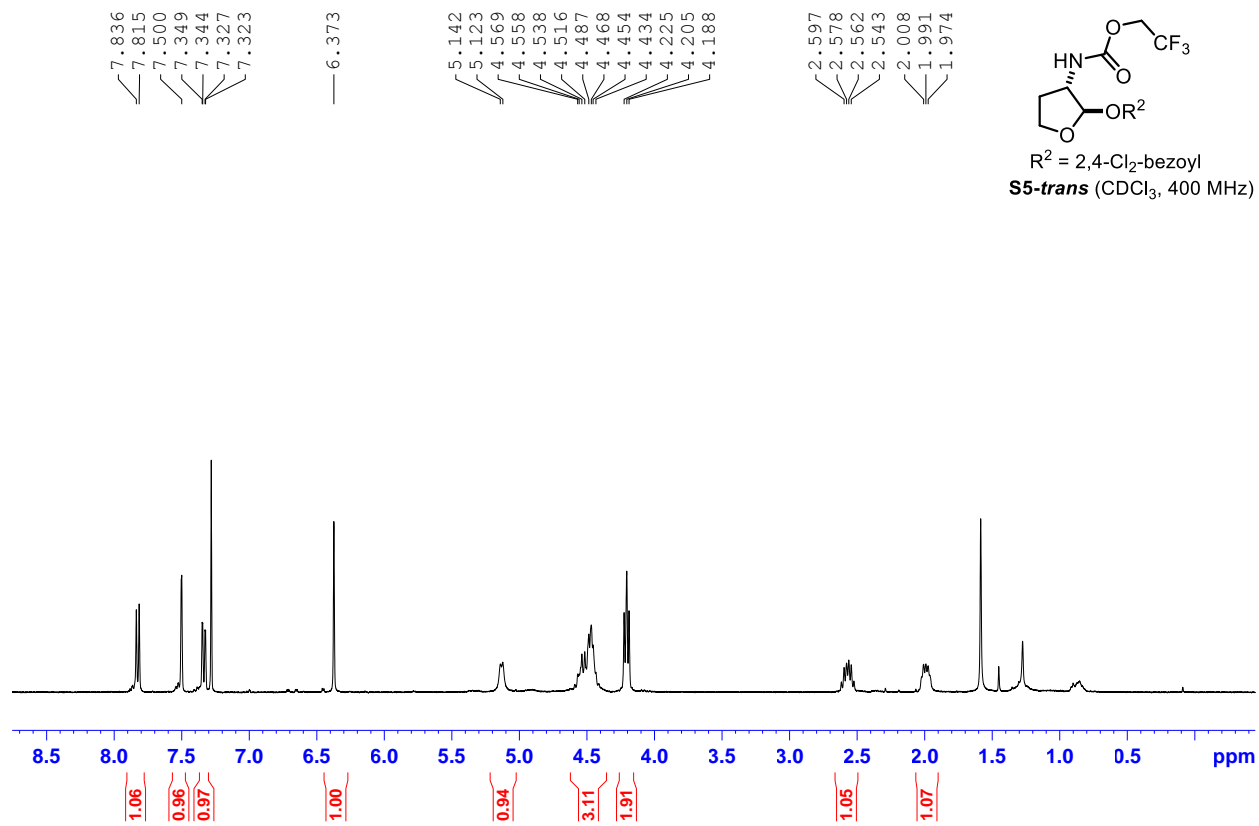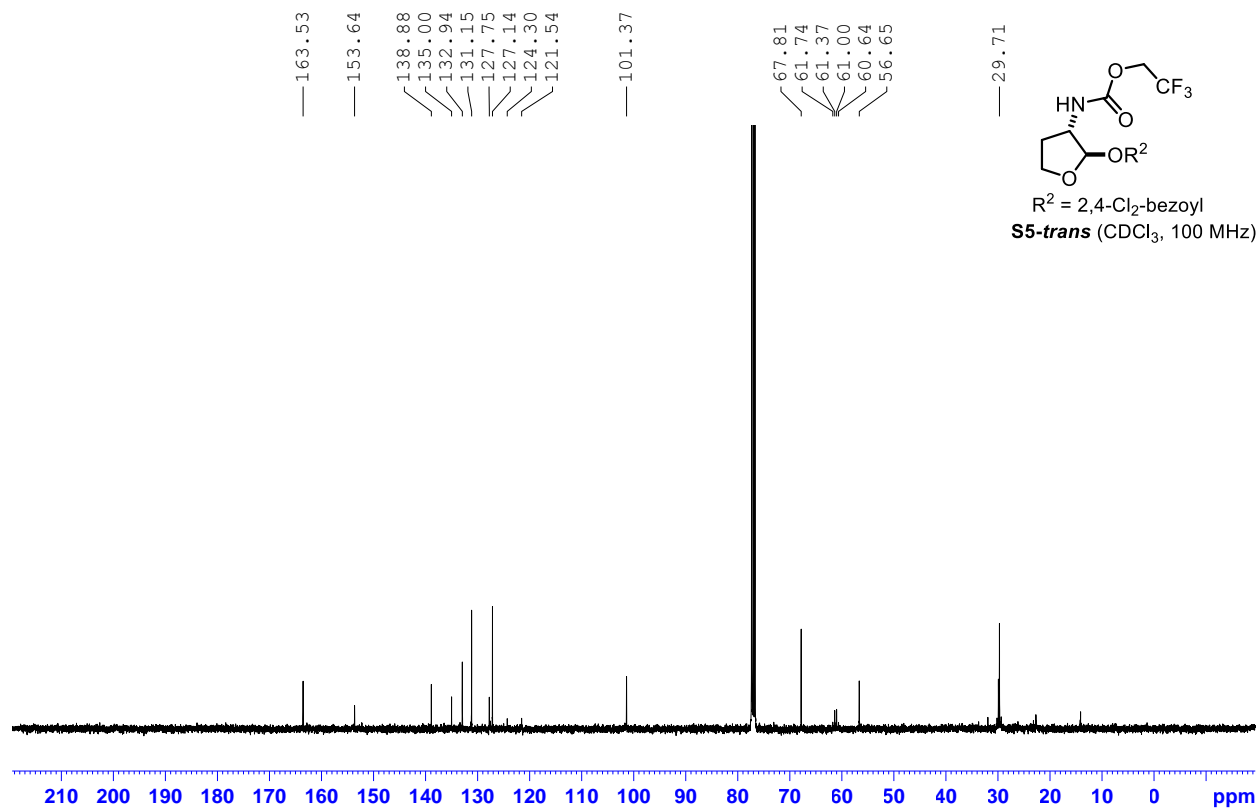

-74.23  
-74.25  
-74.27

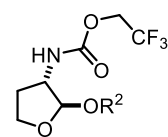

R<sup>2</sup> = 2,4-Cl<sub>2</sub>-benzoyl  
**S5-trans** (CDCl<sub>3</sub>, 377 MHz)

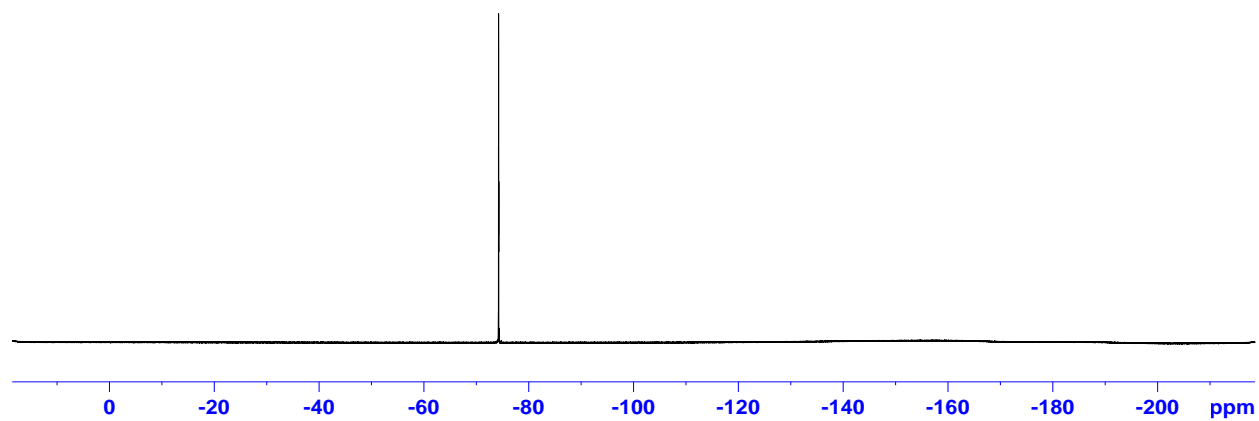

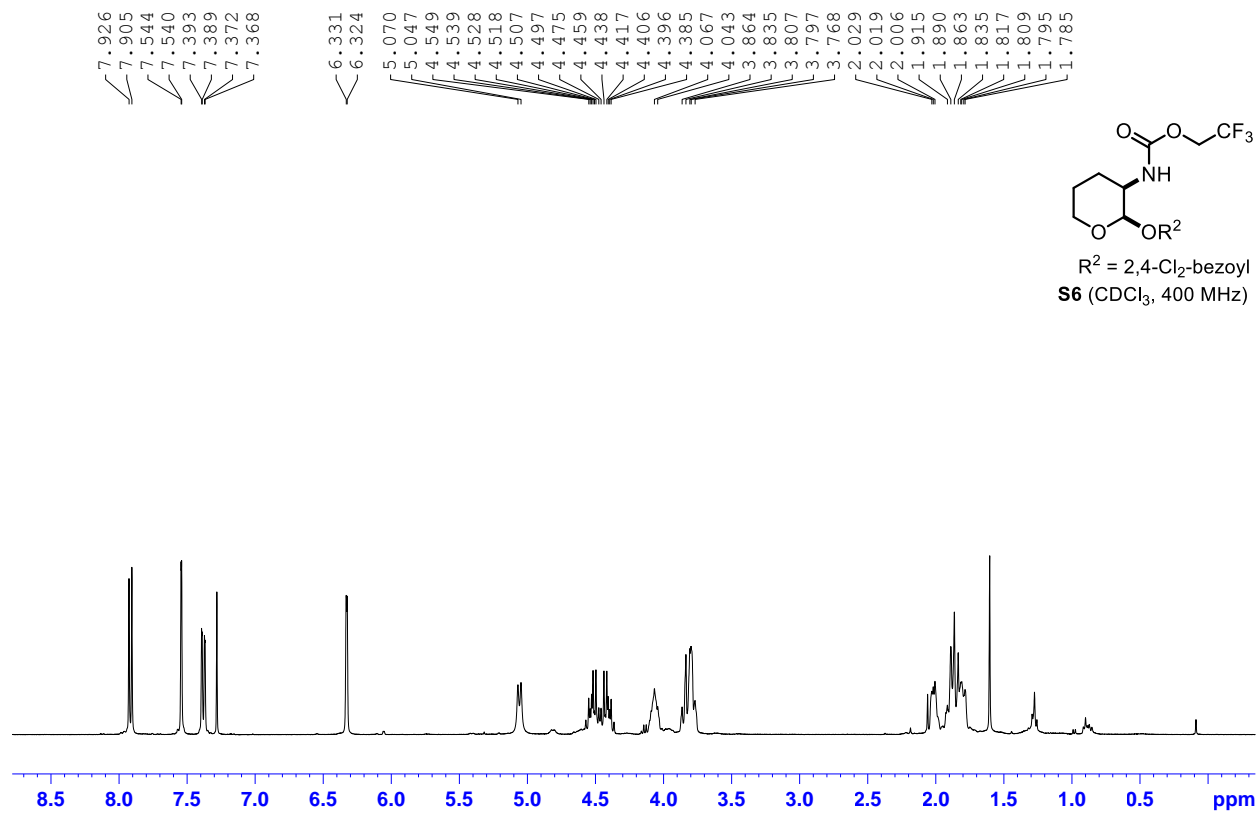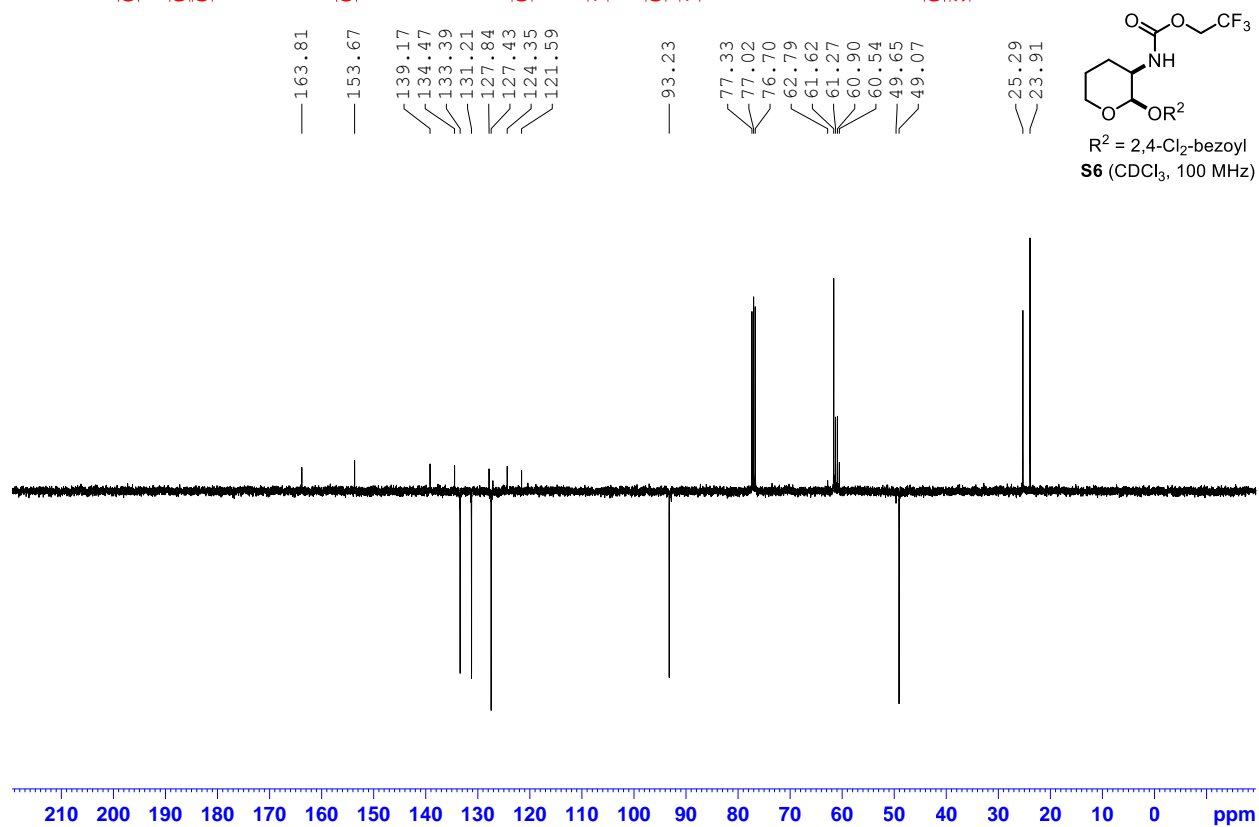

-74.23  
-74.25  
-74.27

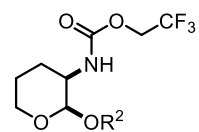

R<sup>2</sup> = 2,4-Cl<sub>2</sub>-benzoyl  
S6 (CDCl<sub>3</sub>, 377 MHz)

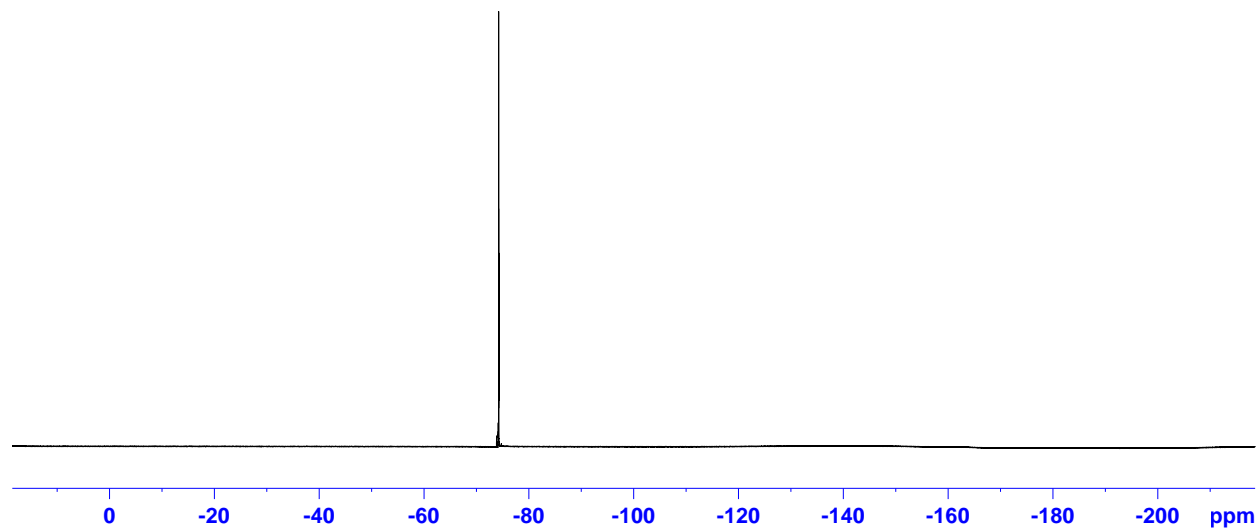



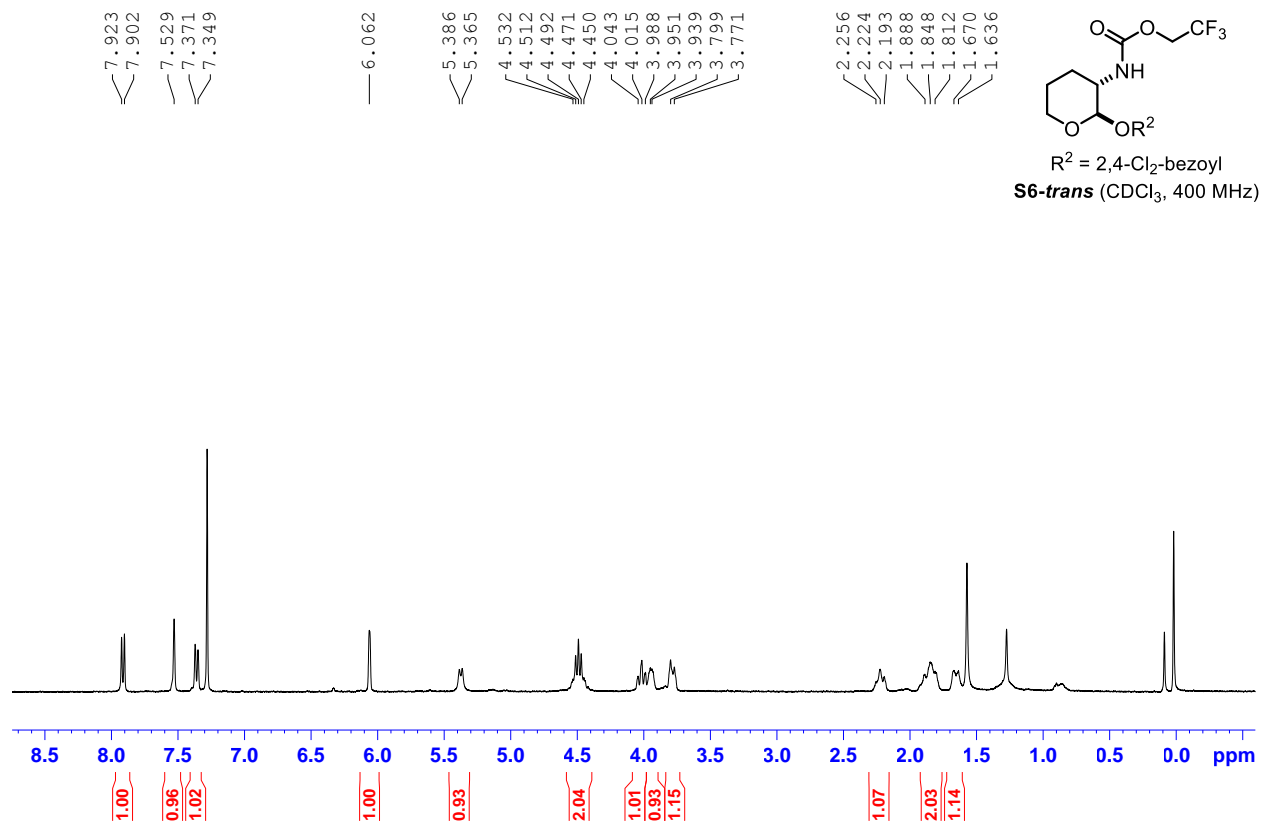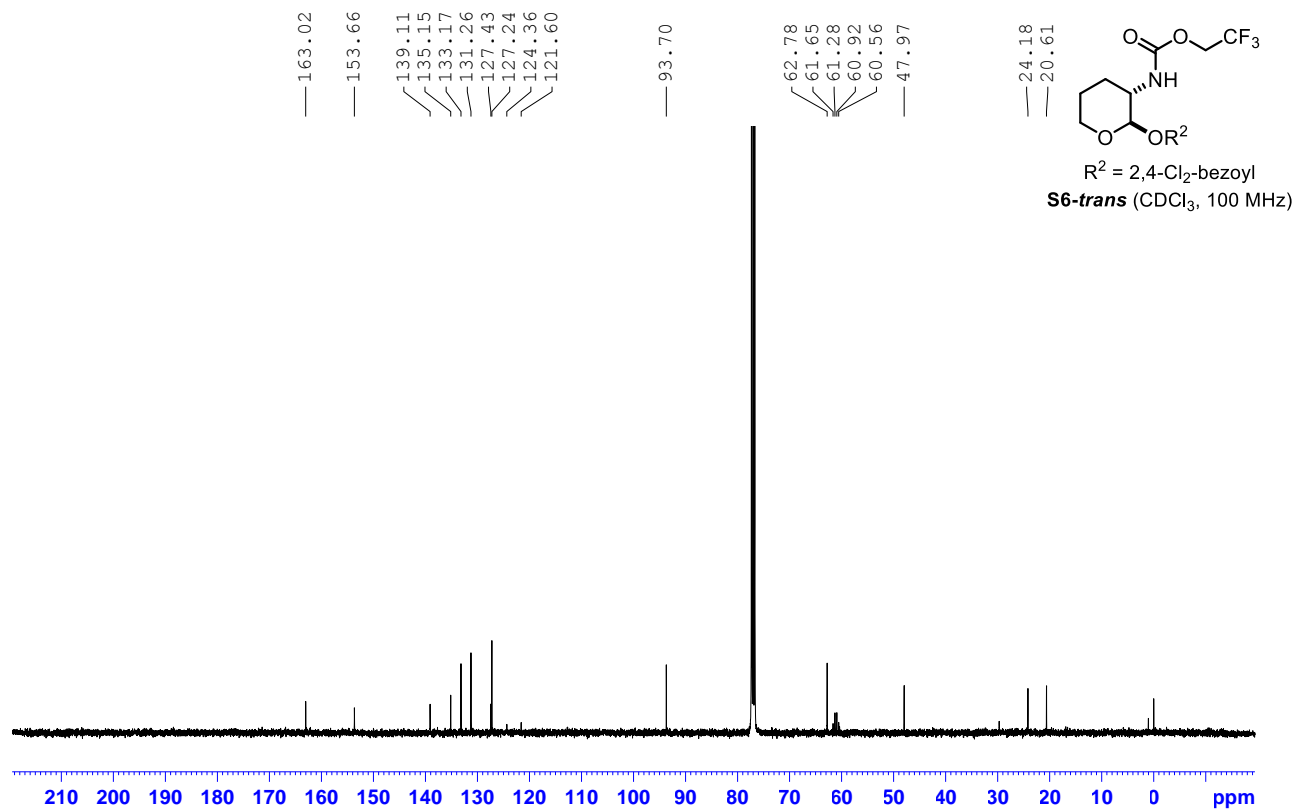

-74.23  
-74.25  
-74.27

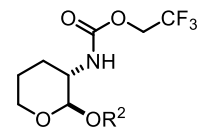

R<sup>2</sup> = 2,4-Cl<sub>2</sub>-benzoyl  
**S6-trans** (CDCl<sub>3</sub>, 377 MHz)

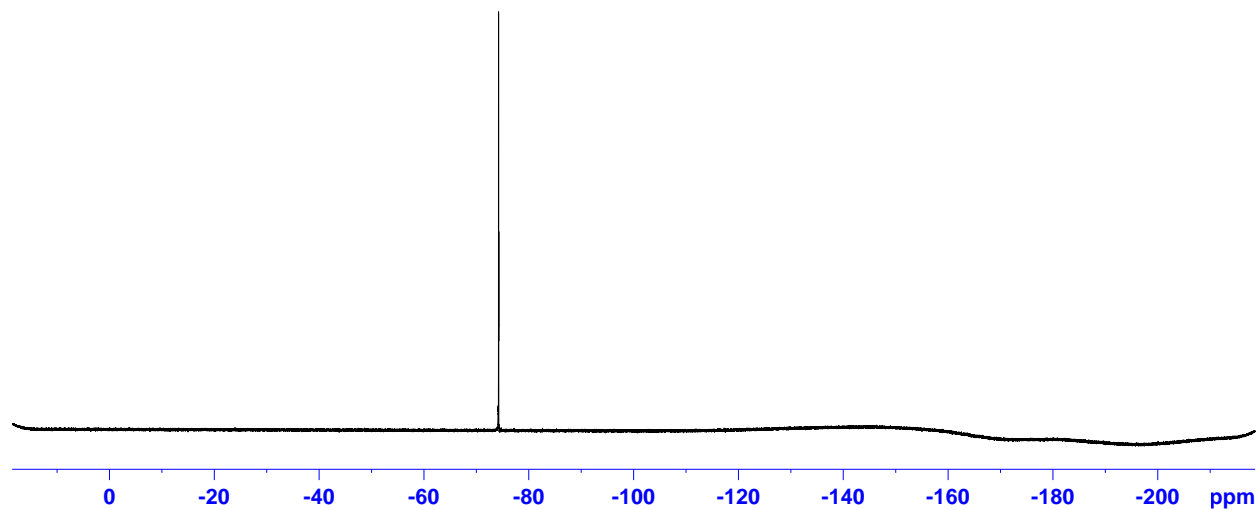

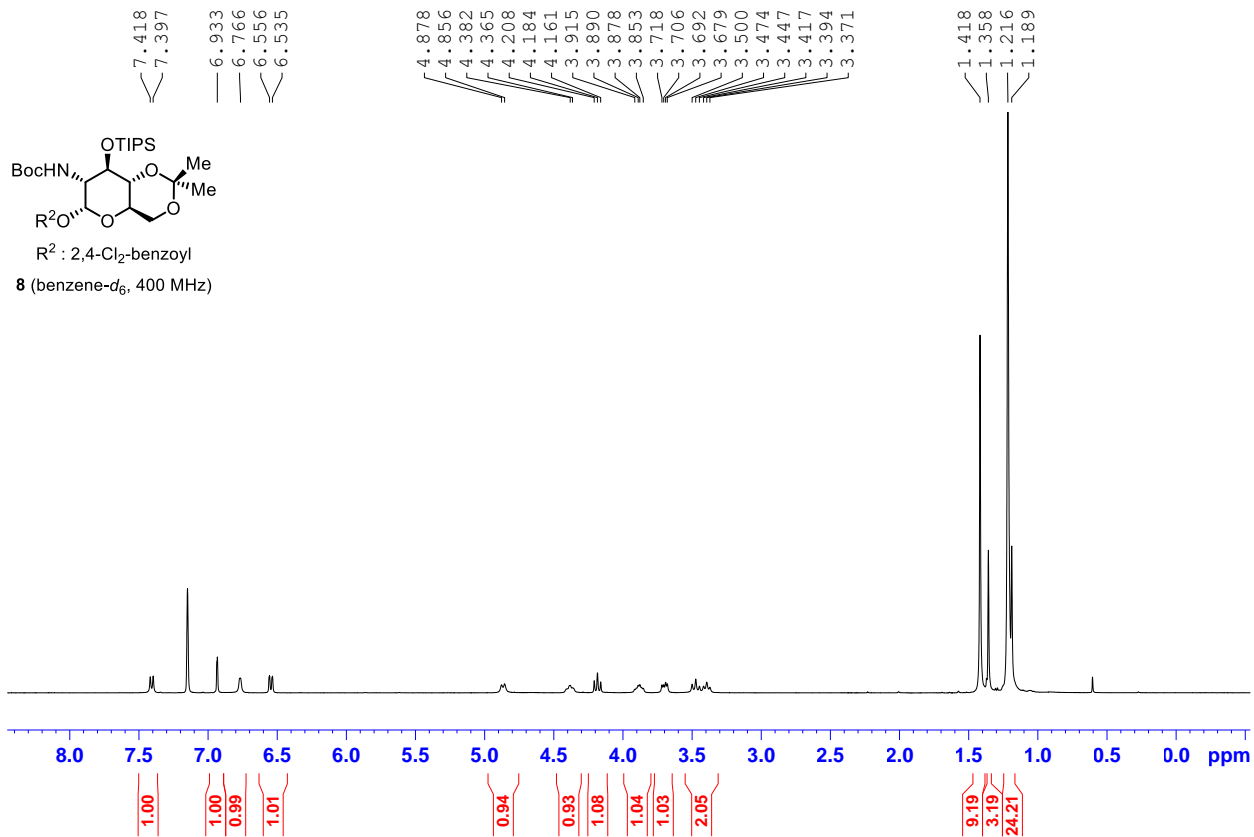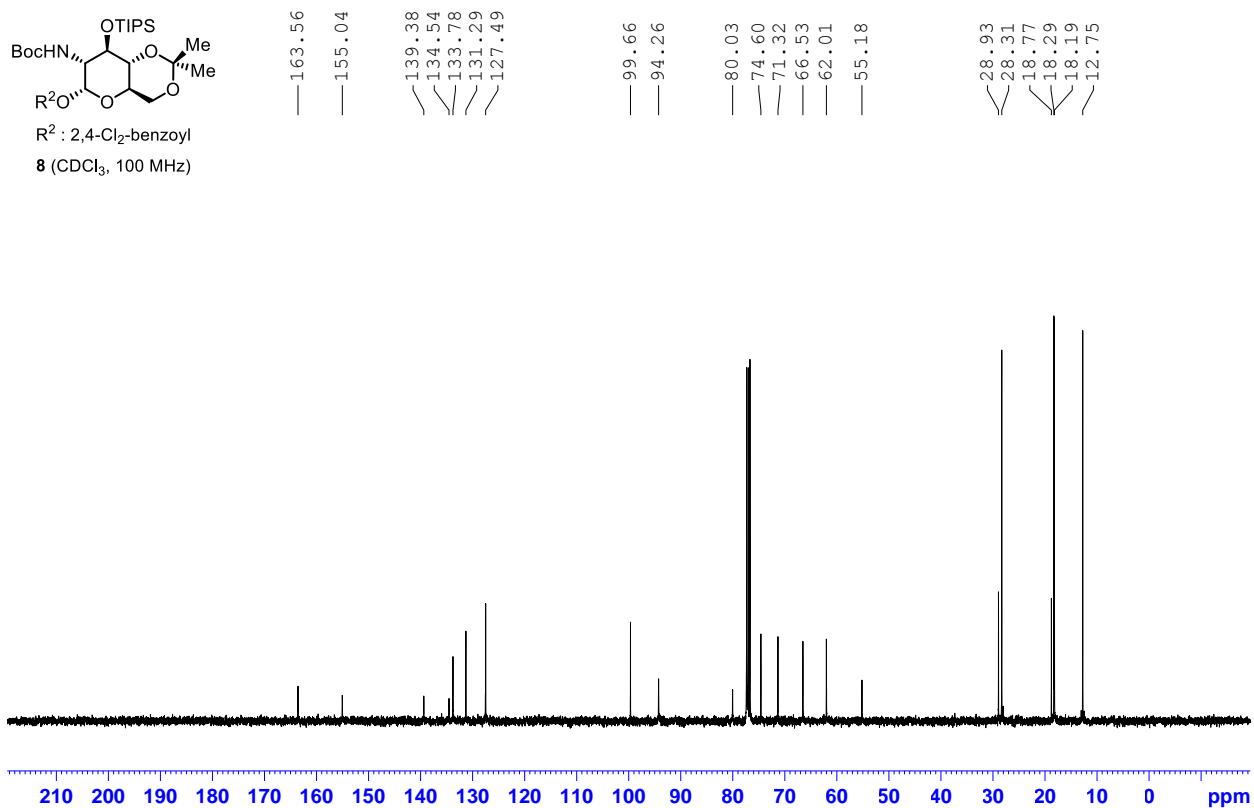

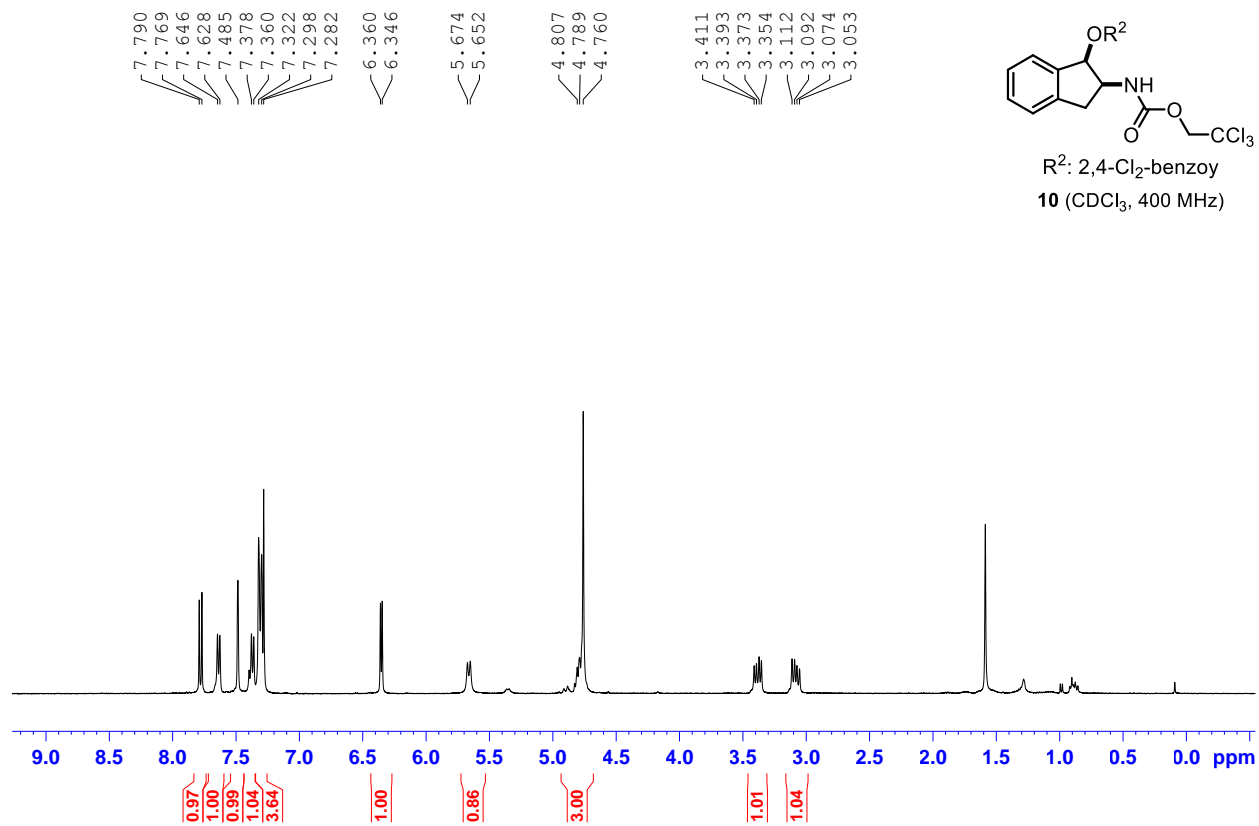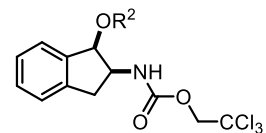

$\text{R}^2$ : 2,4- $\text{Cl}_2$ -benzoy  
**10** ( $\text{CDCl}_3$ , 400 MHz)

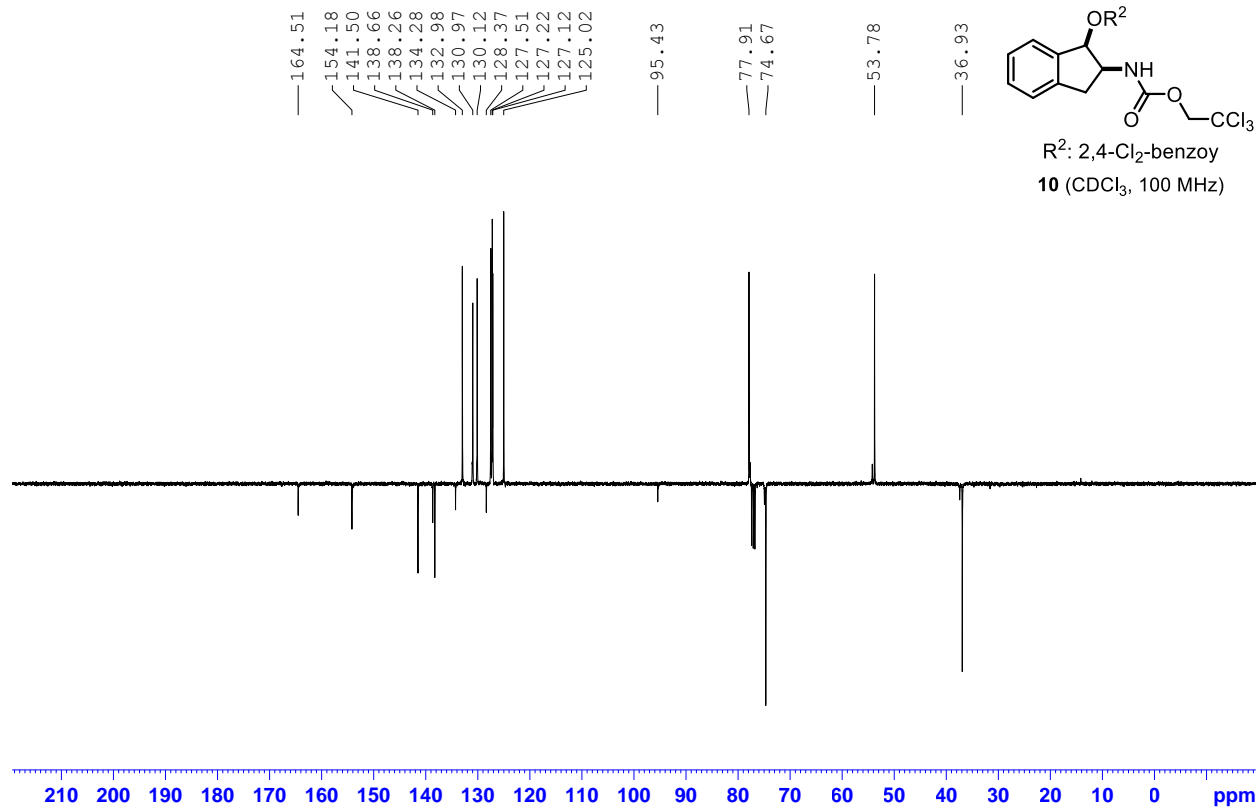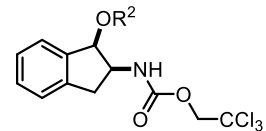

$\text{R}^2$ : 2,4- $\text{Cl}_2$ -benzoy  
**10** ( $\text{CDCl}_3$ , 100 MHz)

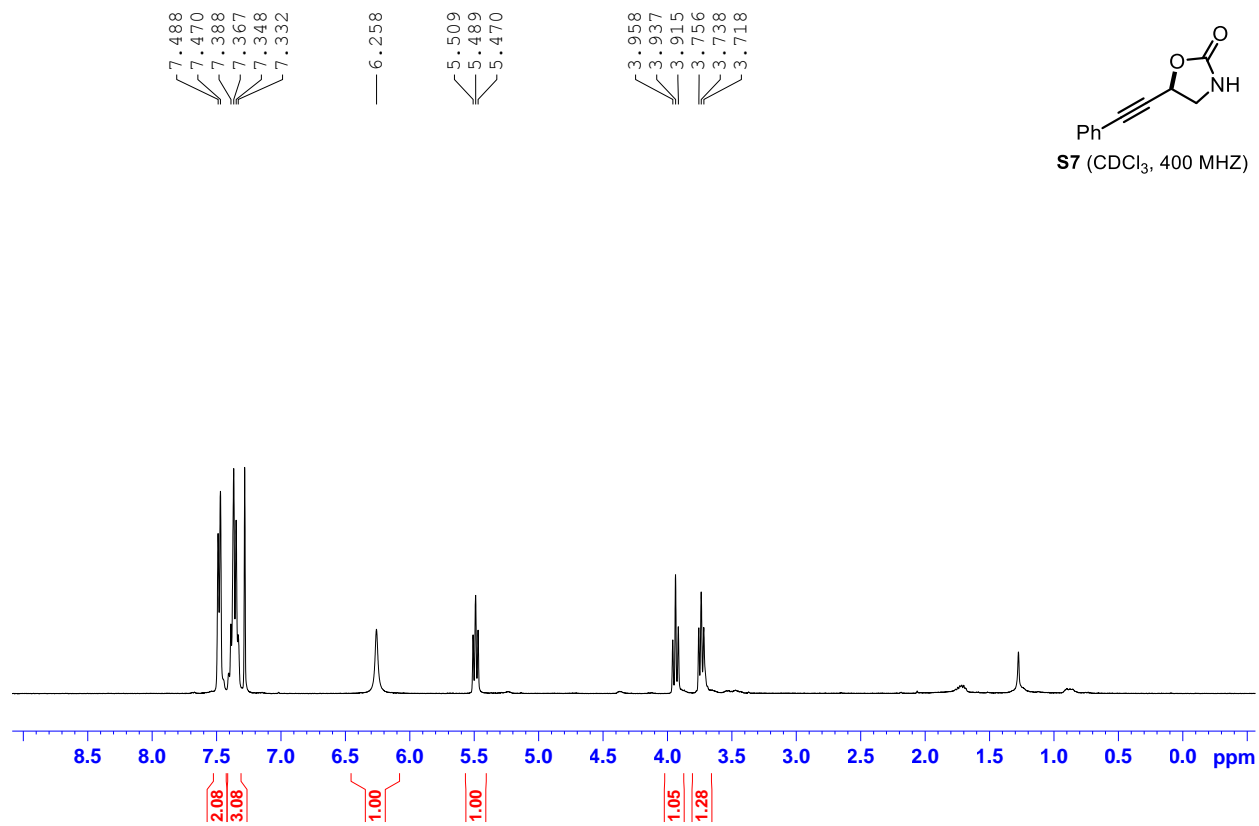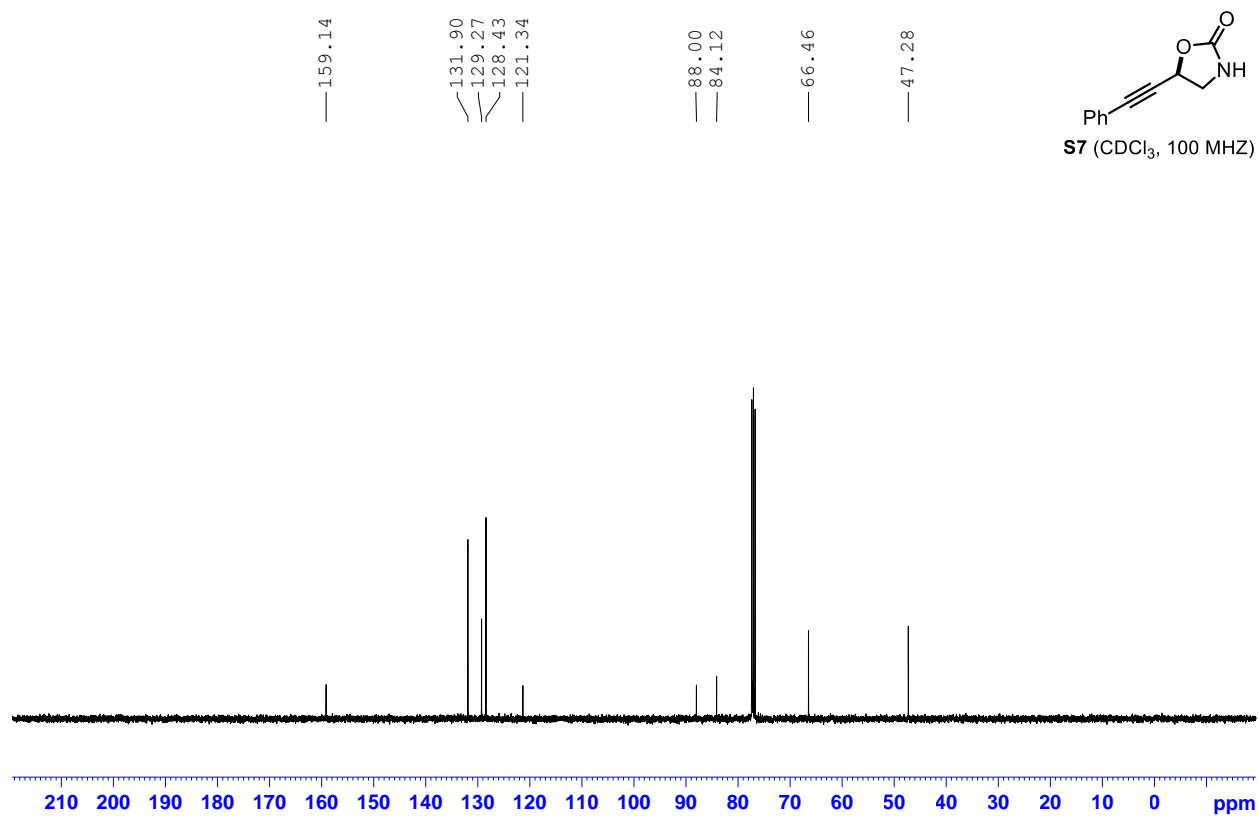

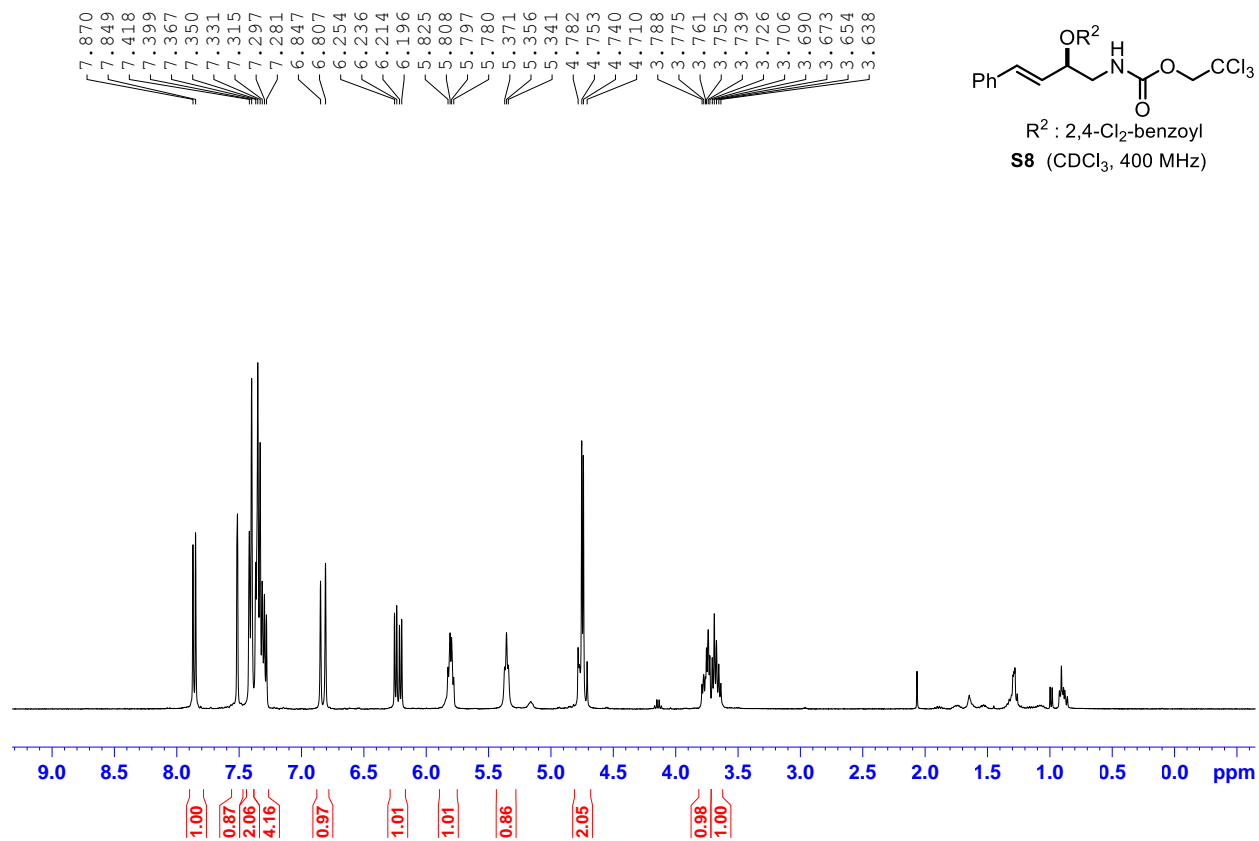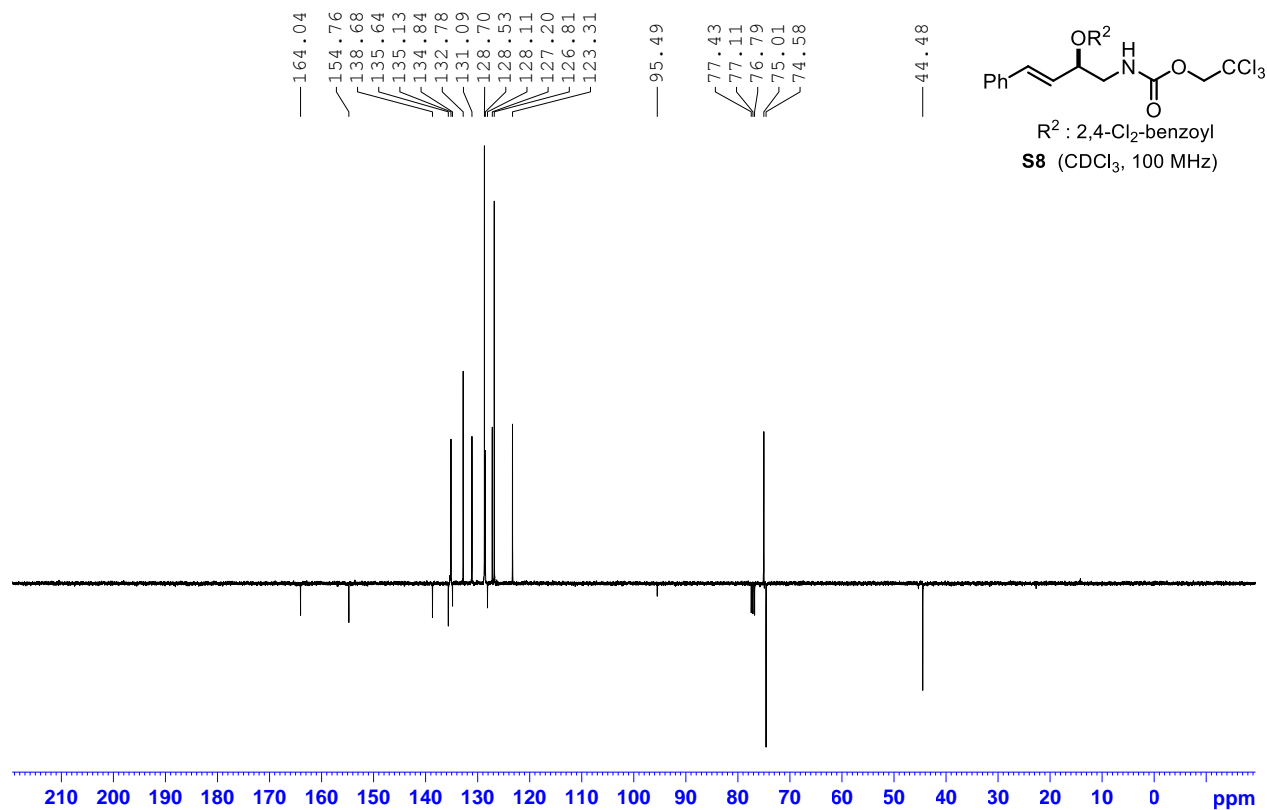

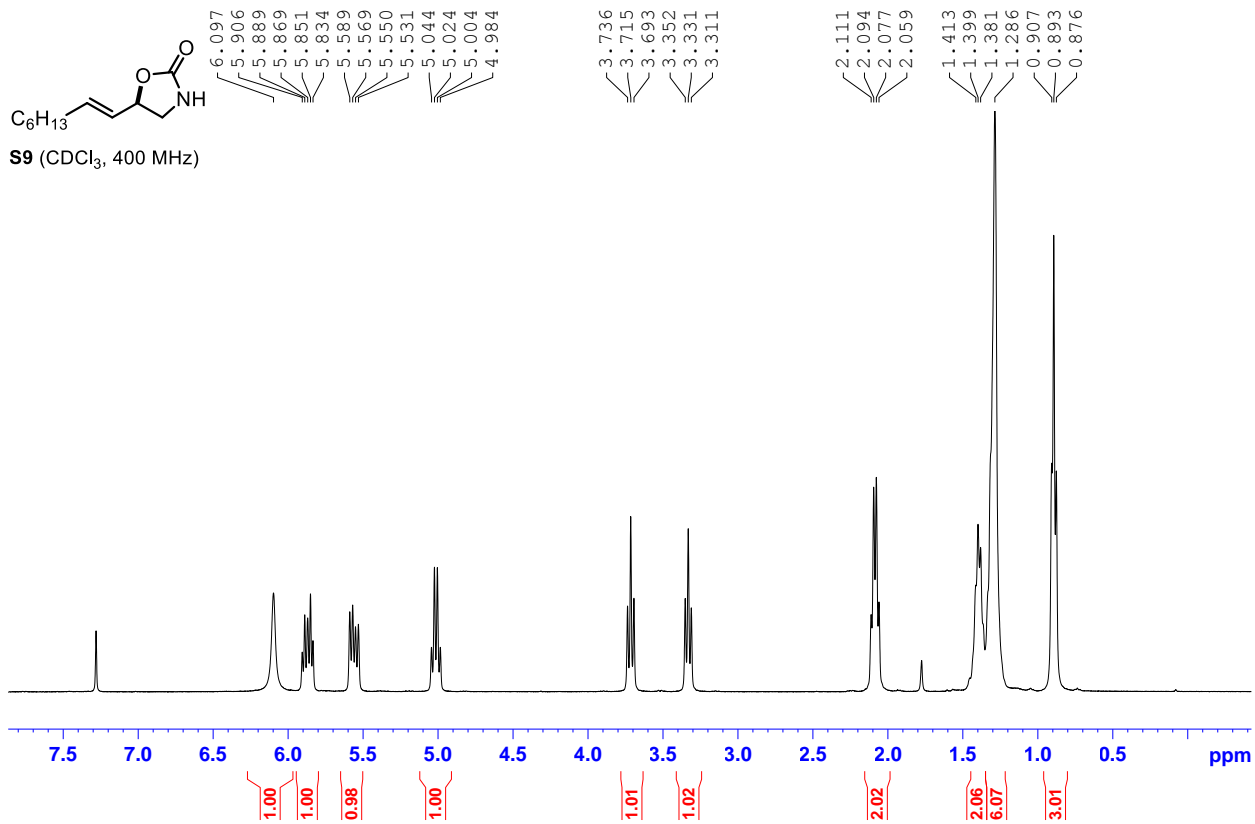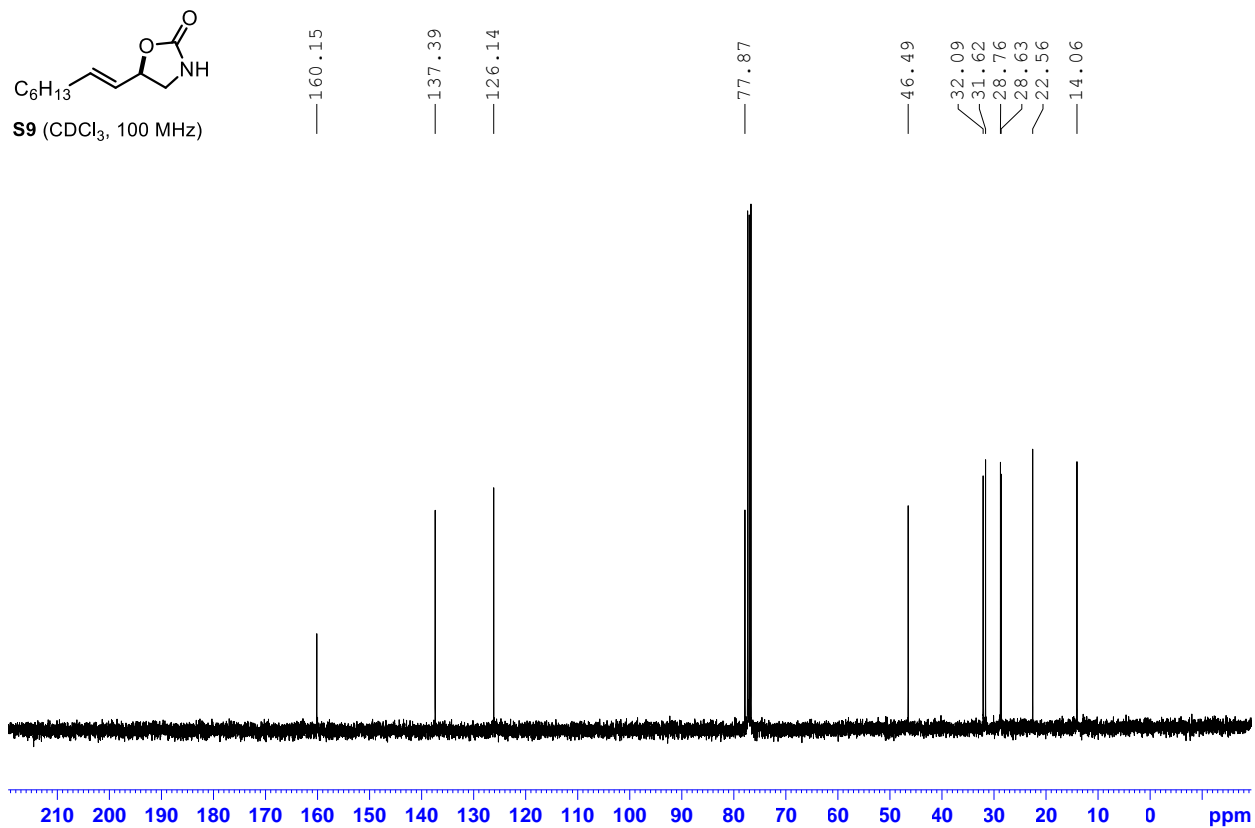

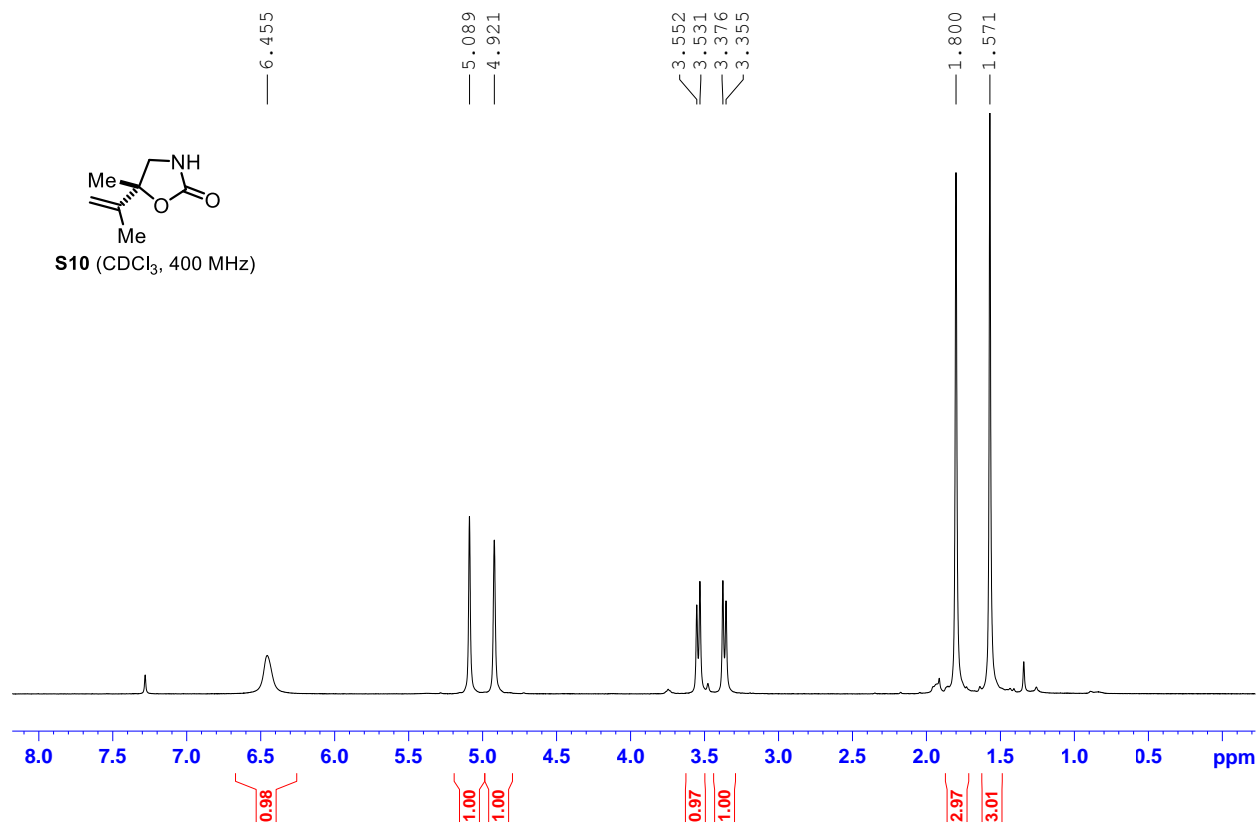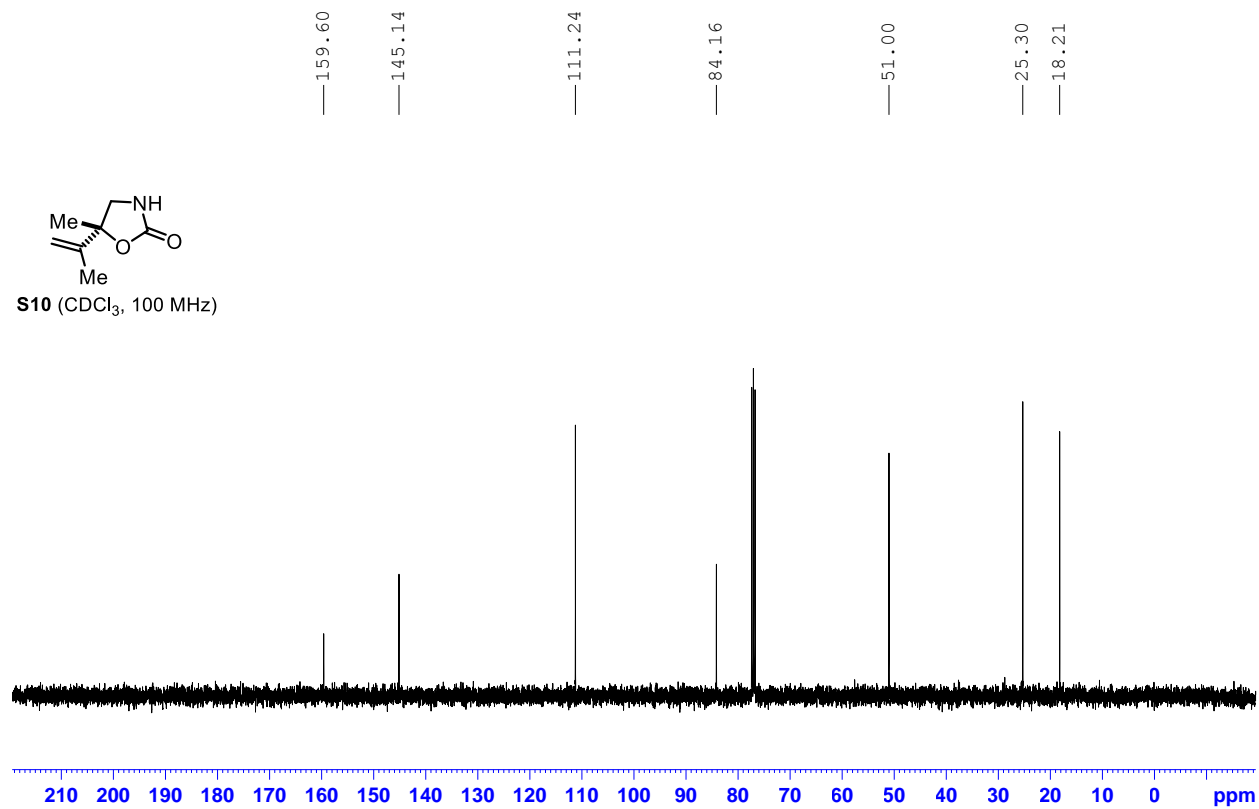



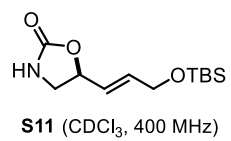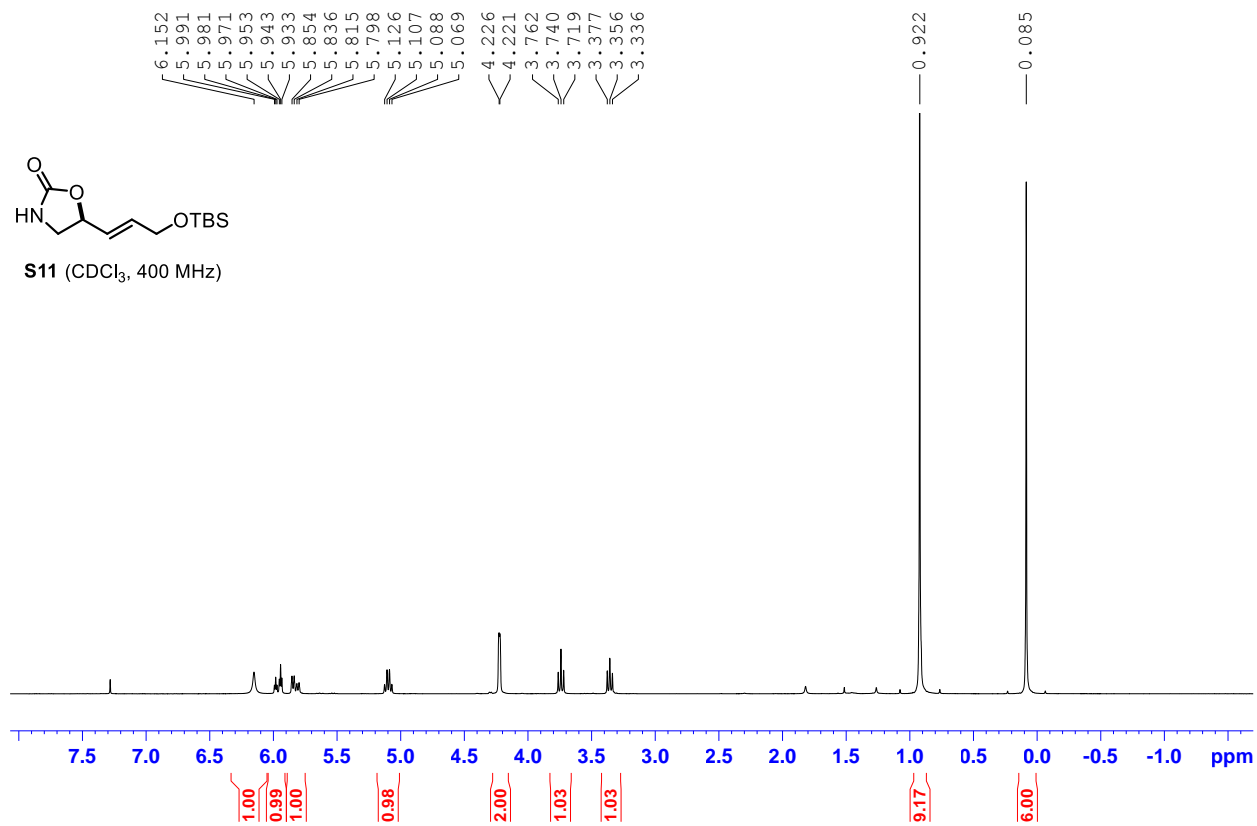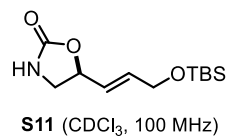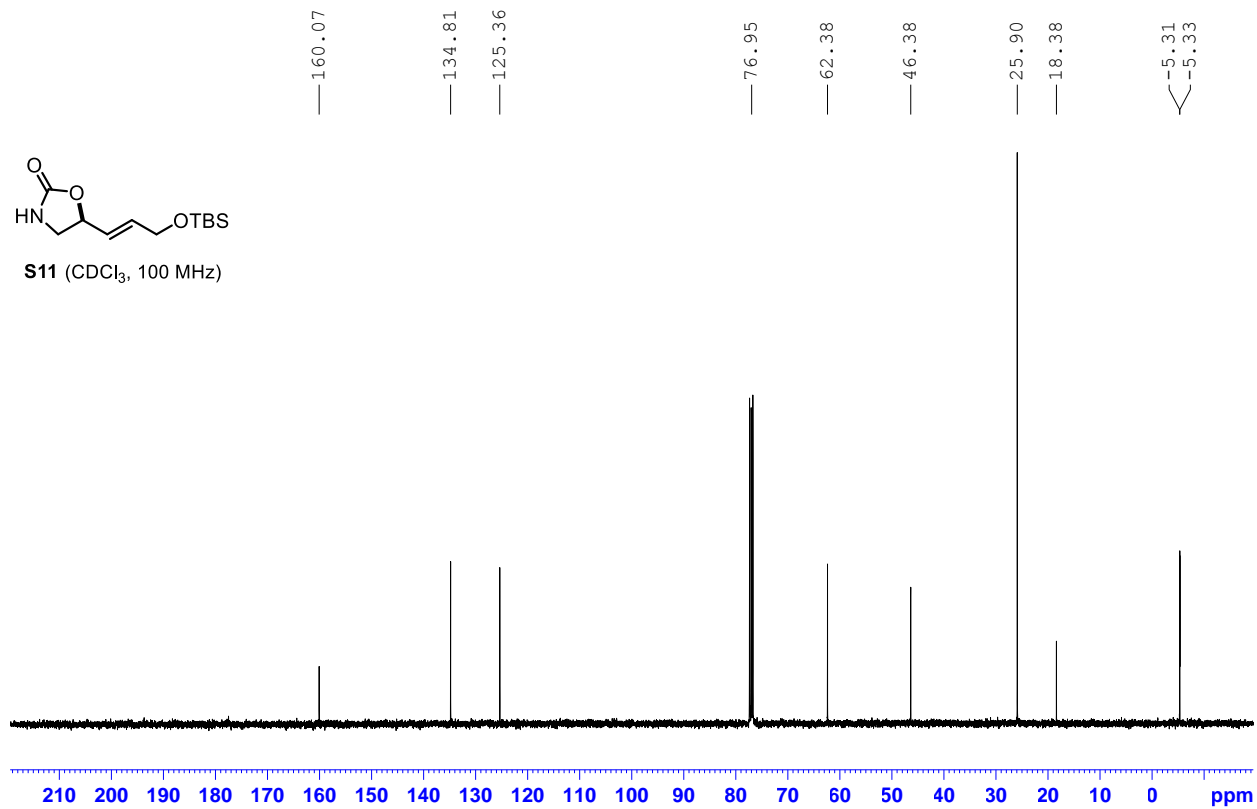

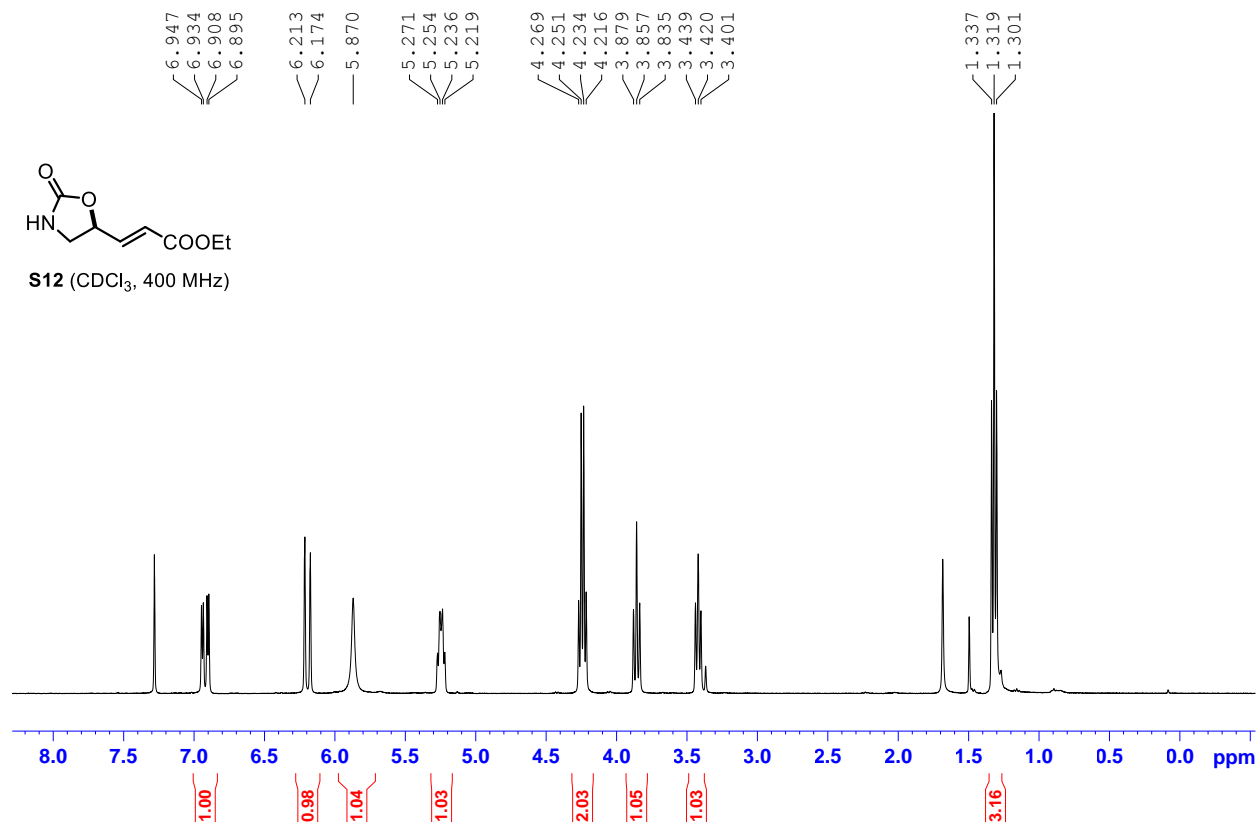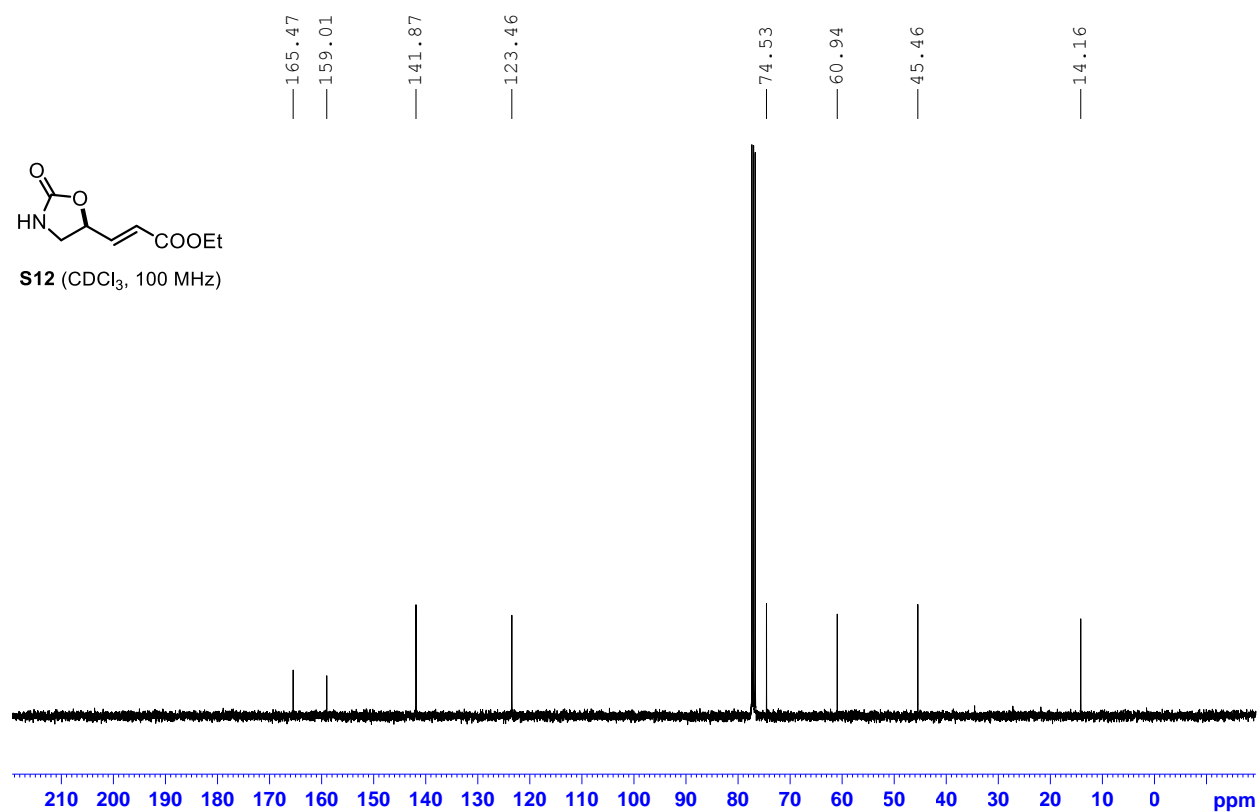

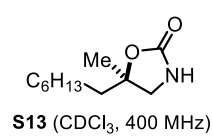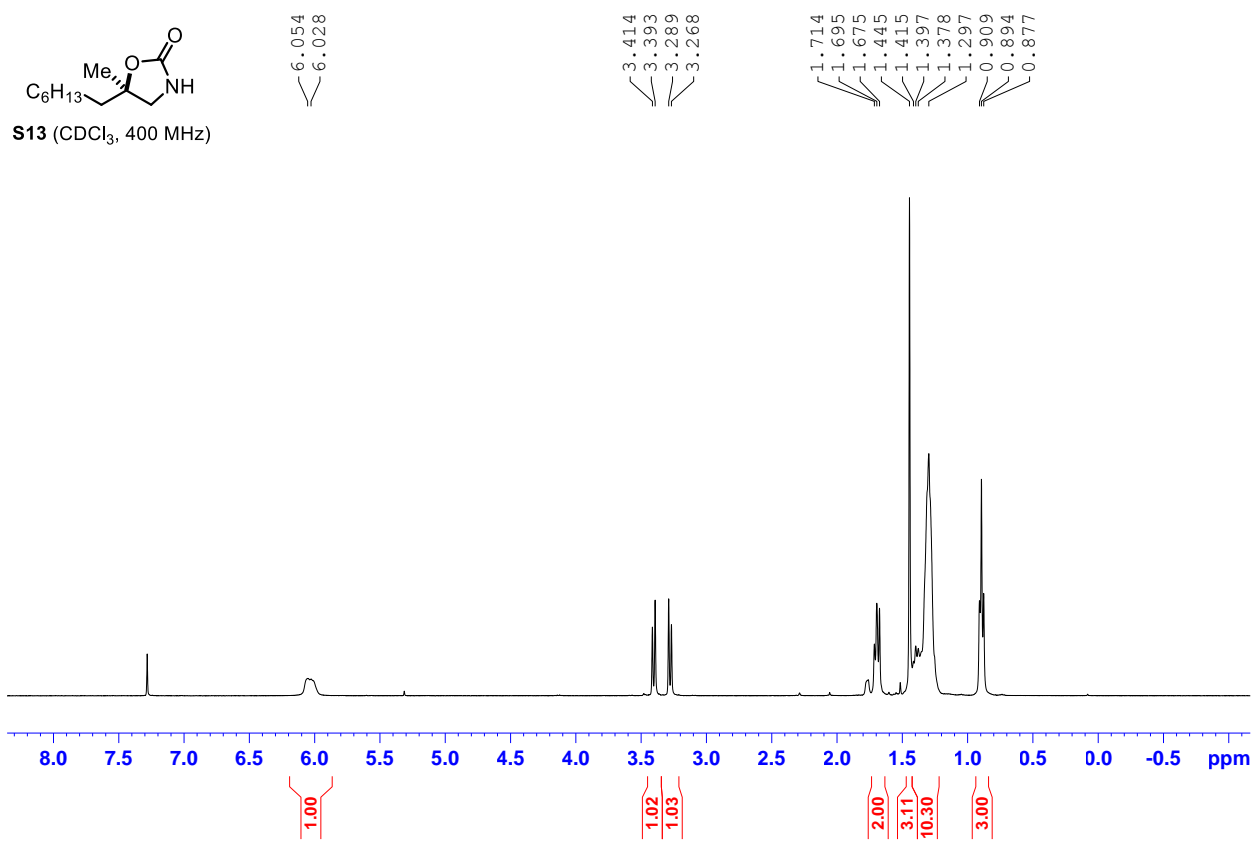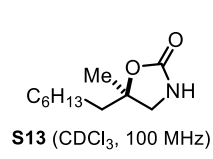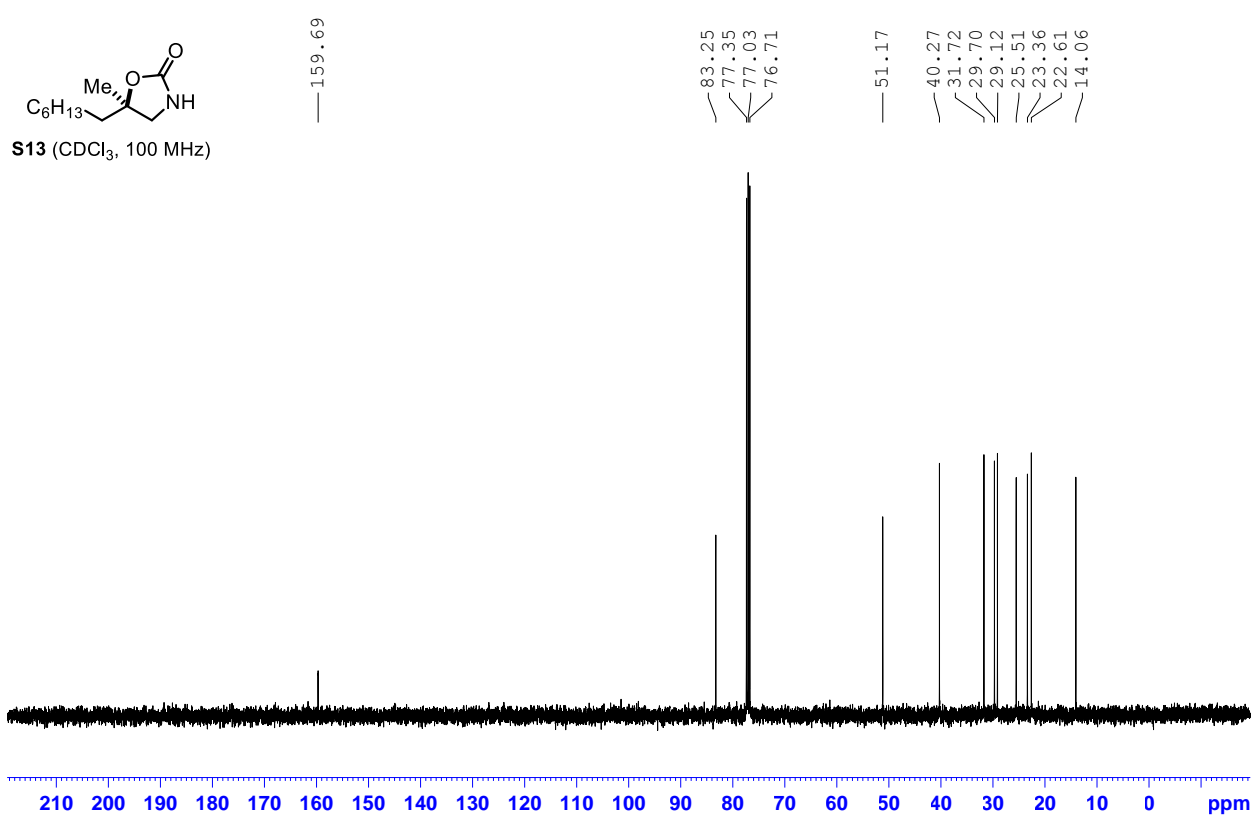

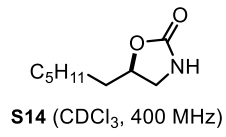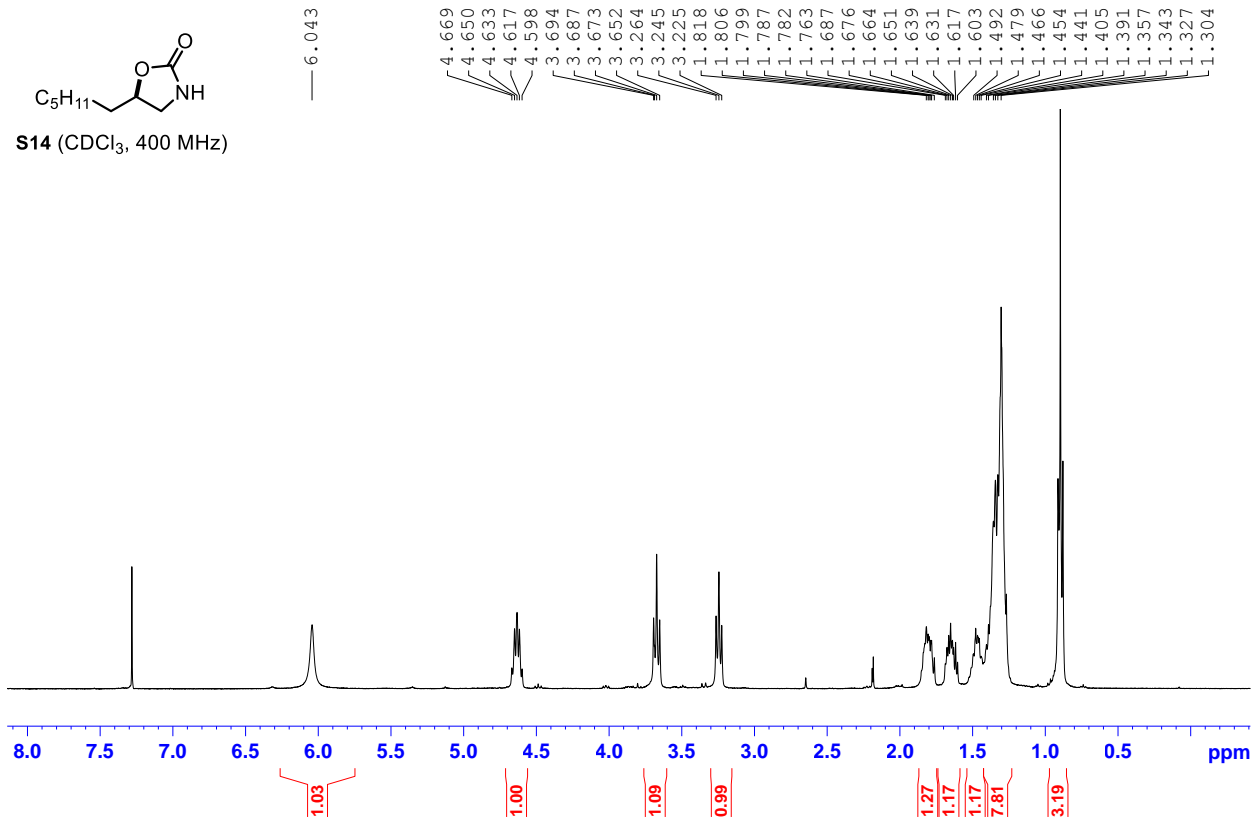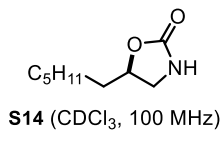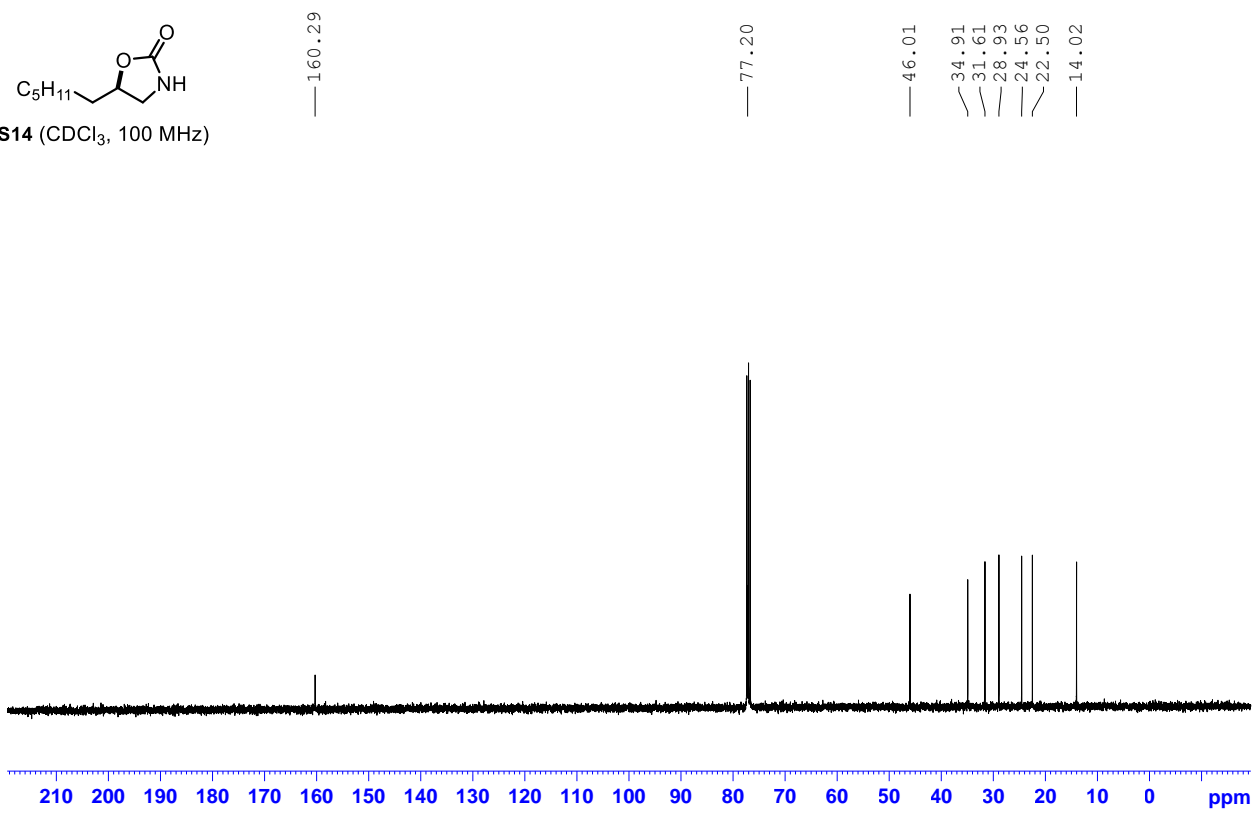

Supplement: NIHMS810139-supplement-SI.pdf [file NIHMS810139-supplement-SI.pdf]
